# Supplementary material for: Transcriptomic and spatial dissection of human ex vivo right atrial tissue reveals proinflammatory microvascular changes in ischemic heart disease
Source: PubMed Central journal article supplement (PMC11148807; doi:10.1016/j.xcrm.2024.101556), 2024-05-21
Supplement: mmc1.pdf [file mmc1.pdf]

**Supplemental information**

**Transcriptomic and spatial dissection of human *ex vivo* right atrial tissue reveals proinflammatory microvascular changes in ischemic heart disease**

**Suvi Linna-Kuosmanen, Eloi Schmauch, Kyriakitsa Galani, Johannes Ojanen, Carles A. Boix, Tiit Örd, Anu Toropainen, Prosanta K. Singha, Pierre R. Moreau, Kristiina Harju, Adriana Blazeski, Åsa Segerstolpe, Veikko Lahtinen, Lei Hou, Kai Kang, Elamaran Meibalan, Leandro Z. Agudelo, Hannu Kokki, Jari Halonen, Juho Jalkanen, Jarmo Gunn, Calum A. MacRae, Maija Hollmén, Juha E.K. Hartikainen, Minna U. Kaikkonen, Guillermo García-Cardeña, Pasi Tavi, Tuomas Kiviniemi, and Manolis Kellis**

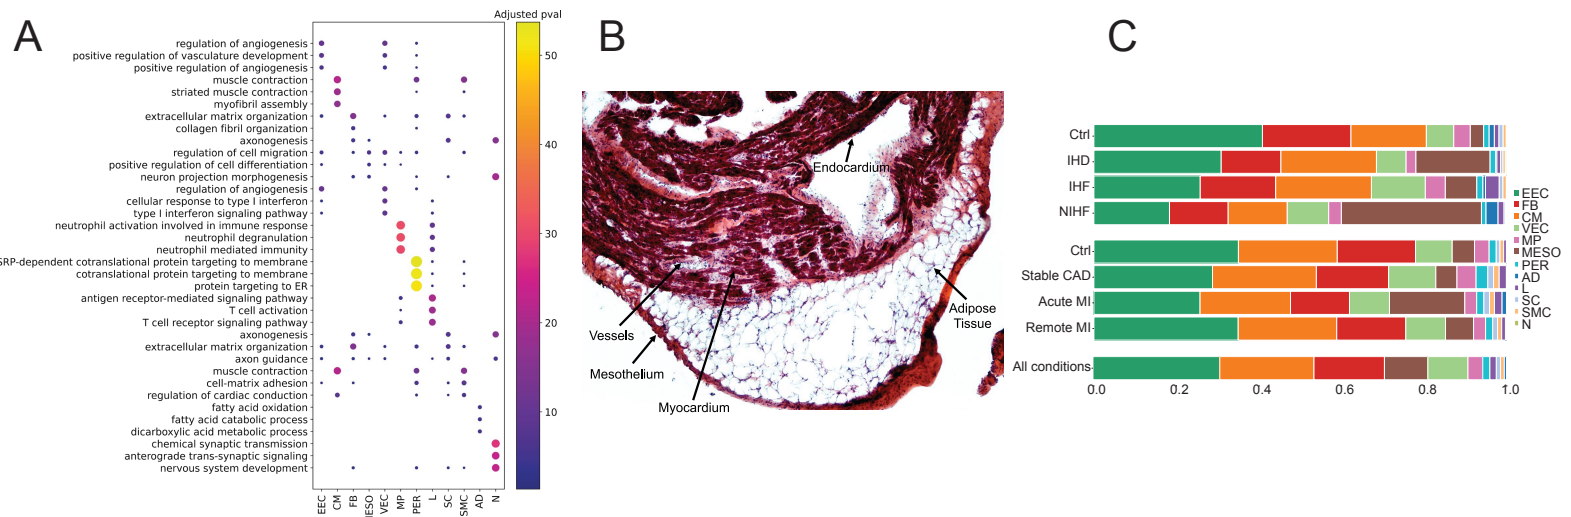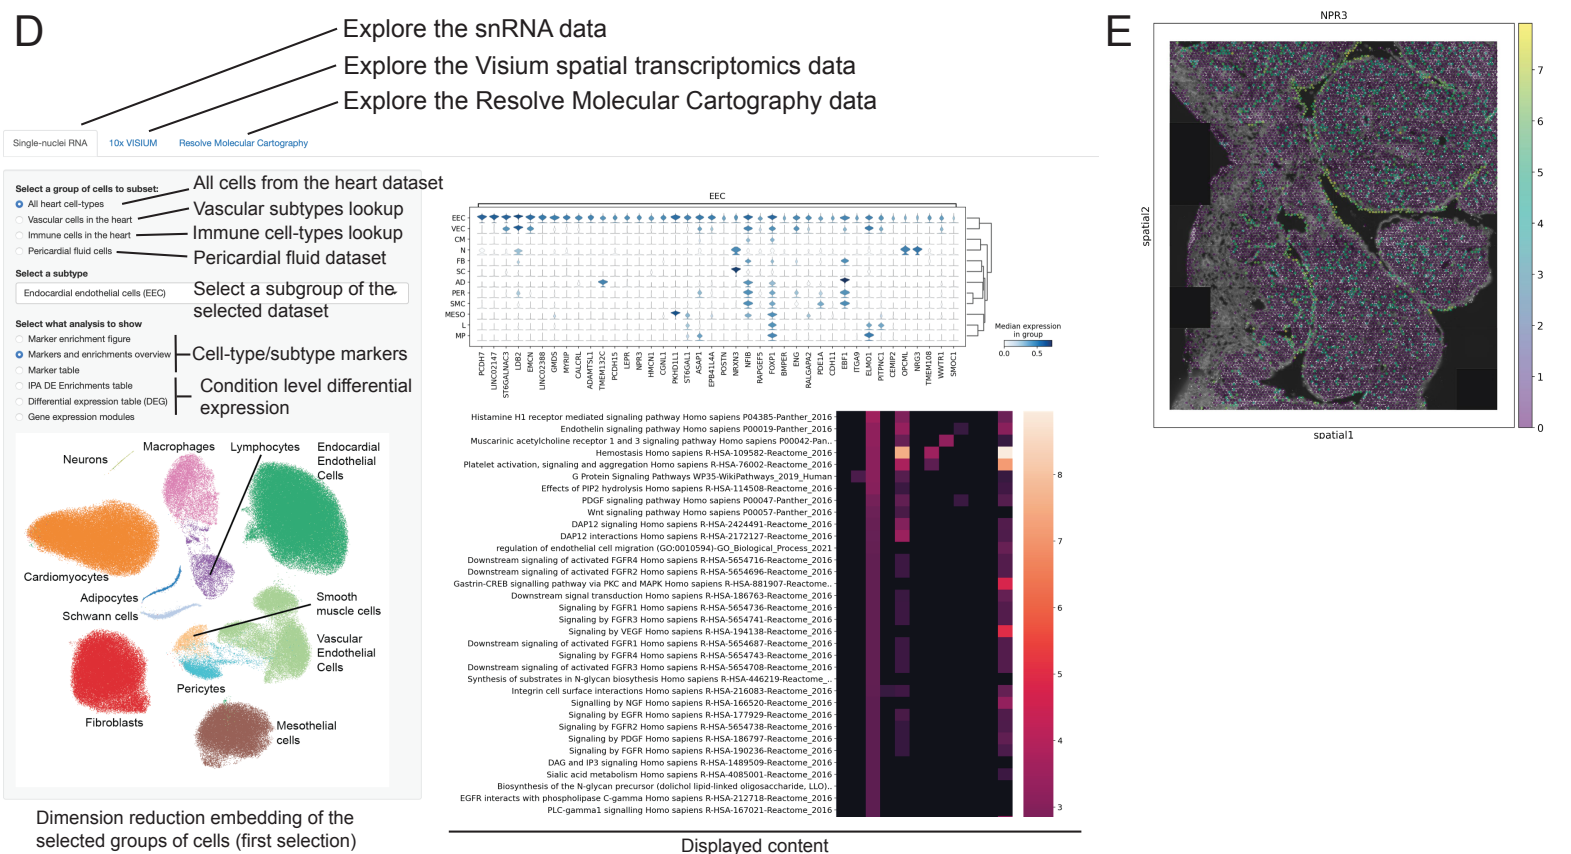

<http://compbio2.mit.edu/sheart/>

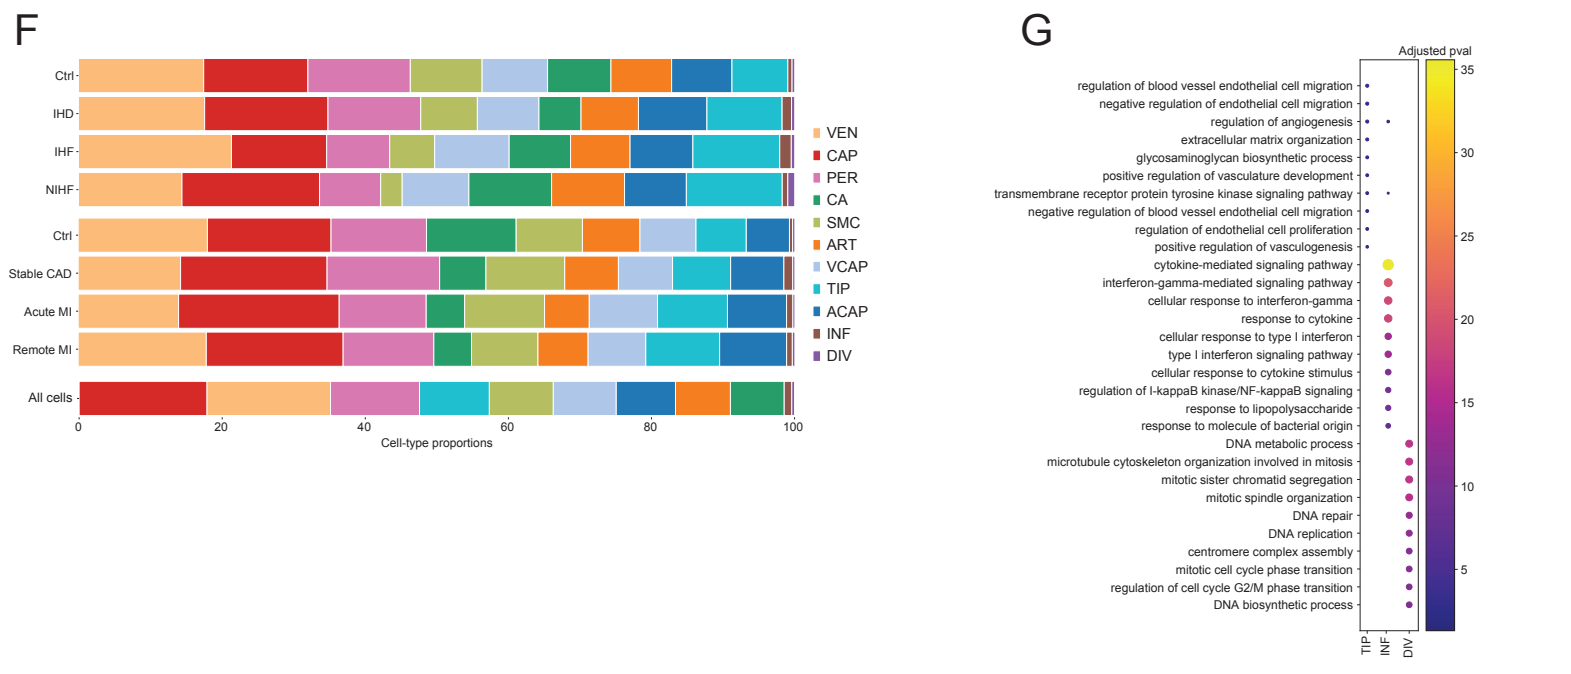

**Fig. S1. Heart cell-types and subtypes distribution and enrichments. Related to Figures 1 and 2.**

**A.** Top 3 enriched gene sets (GO Biological Process) for top 1000 genes with  $FDR < 0.05$  for each cell type. Dot color and size is  $-\log_{10}(\text{adjusted p-value})$ . Only significant (adjusted p-value  $< 0.05$ ) enrichments are shown. **B.** Hematoxylin-eosin-stained histology slide of a right atrial appendage sample from a patient with IHD (included in the dataset). **C.** Proportion of the main cell types, per condition. **D.** Interactive website overview. An interactive website is accessible at <http://compbio.mit.edu/sheart>. It provides access to the analyzed snRNA-seq and spatial transcriptomics data (both Visium and Resolve Molecular Cartography) presented in this study. The user can select the ensemble of cells to focus on (all heart cells, vascular heart cells, immune heart cells, pericardial fluid data) and explore different information types (1. Gene set enrichment of subtype/cell-type marker genes 2. Subtype/cell-type marker gene overview. 3. Subtype/cell-type marker genes table. 4. IPA enrichment table from differential expression result of a selected condition in the subtype/cell-type. 5. Differential expression result table of a selected condition in the subtype/cell-type. 6. Gene expression module analysis in the selected subtype/cell-type). **E.** Spatial expression of *NPR3* on a Resolve molecular cartography section of the right atrium in IHD sample. **F.** Proportion of vascular cells, per condition. **G.** Top 10 enriched gene sets (GO Biological Process) for top 200 genes with  $FDR < 0.05$  in each subtype, for tip cells (TIP), inflammatory endothelial cells (INF) and dividing endothelial cells (DIV). Dot color and size is  $-\log_{10}(\text{adjusted enrichment p-value})$ . Only significant (adjusted p-value  $< 0.05$ ) enrichments are shown.

### A Cardiomyocyte - IHD

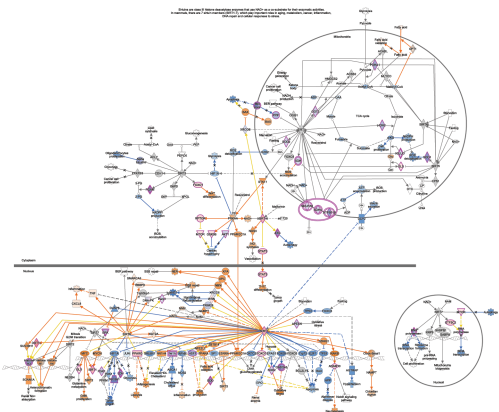

### A Cardiomyocyte - IHF

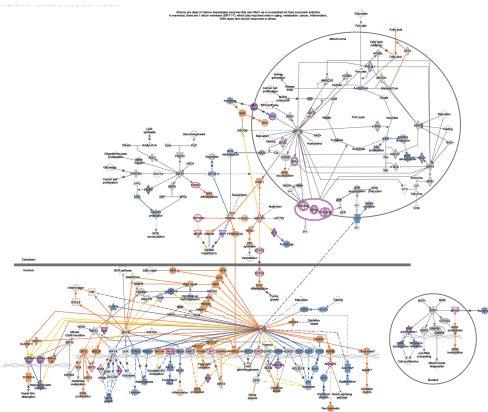

### A Cardiomyocyte - NIHF

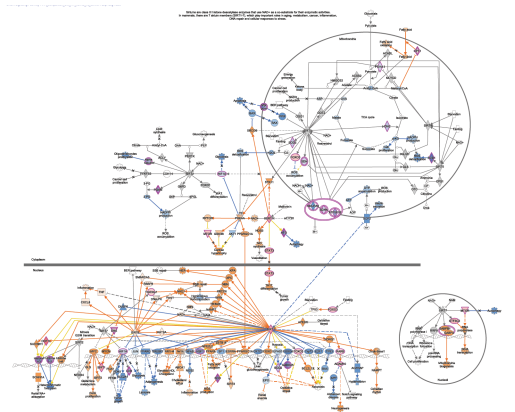

### B Control

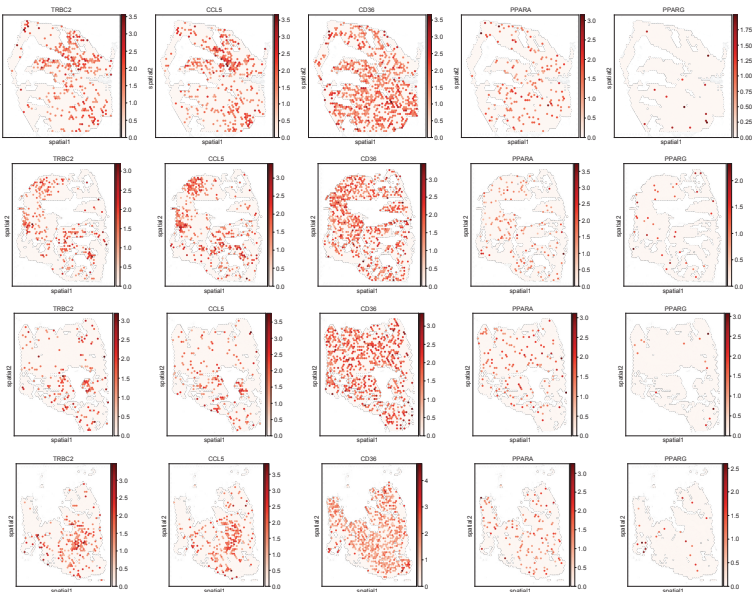

### B HF

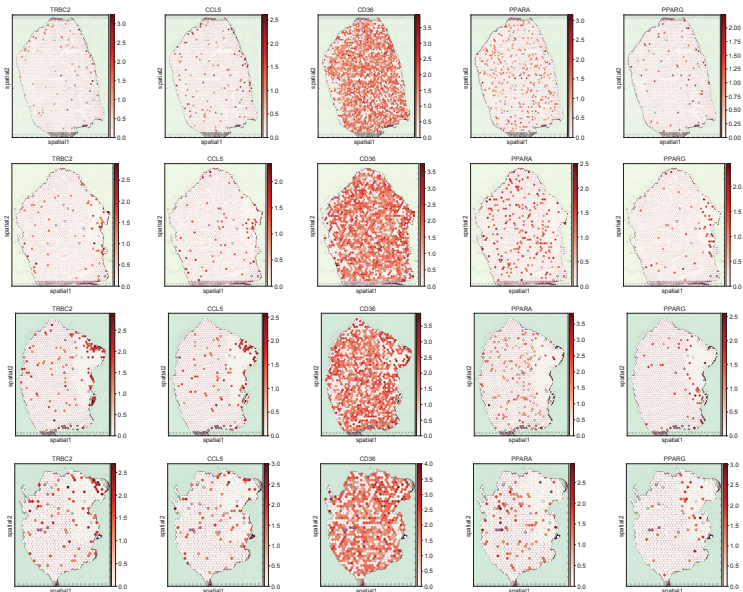

### C Cardiomyocyte - IHD

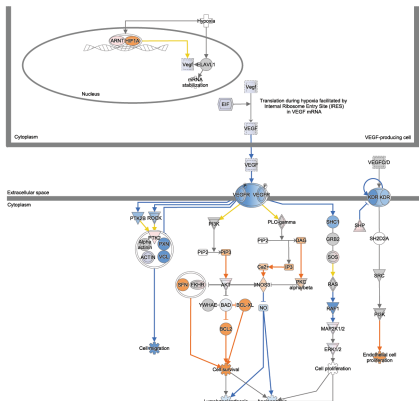

### C Cardiomyocyte - IHF

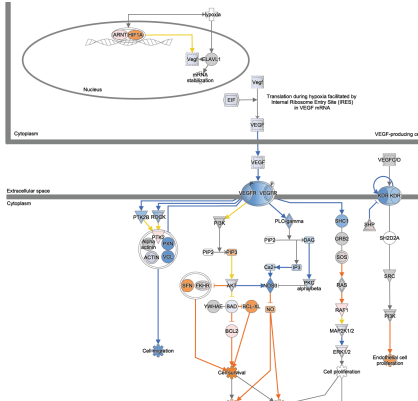

### C Cardiomyocyte - NIHF

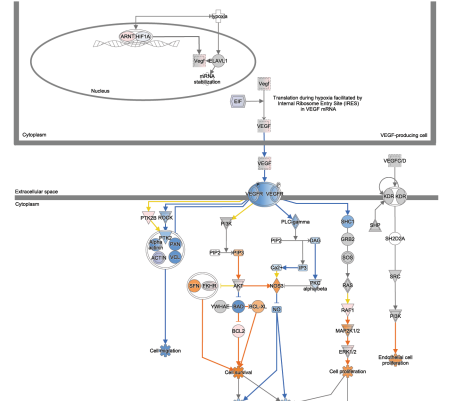

### C Endocardial EC - IHD

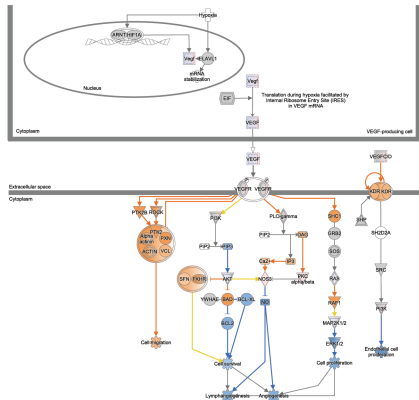

### C Endocardial EC - IHF

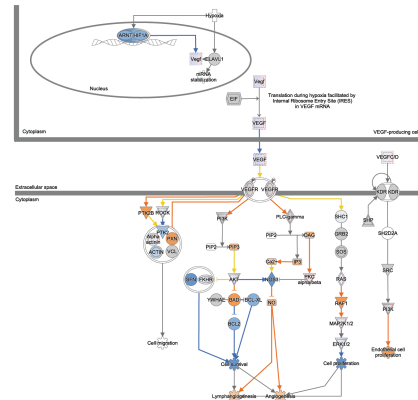

### C Endocardial EC - NIHF

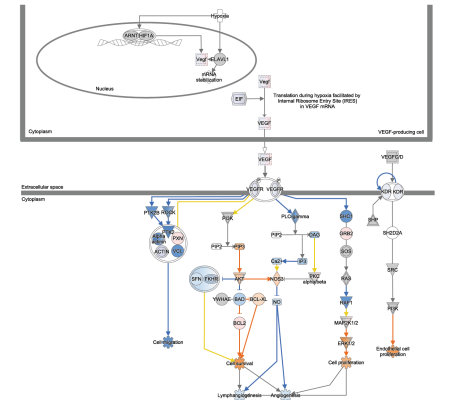

**Fig. S2. Signaling pathway activity enrichment across condition and spatial transcriptomics gene expression changes. Related to Figure 3.**

**A.** Sirtuin signaling pathway from IPA in cardiomyocytes in IHD, IHF, and NIHF. Colors indicate measured and inferred expression/activity changes. Blue stands for downregulation or inhibition, orange/red for upregulation. Yellow line indicates inconsistent changes and purple highlights measured significant changes in the dataset. **B.** Expression of *TRBC2*, *CCL5*, *CD36*, *PPARA*, *PPARG* on Visium slides, from a patient with heart failure and a control sample ( $n=4$ ). **C.** VEGF signaling pathway from IPA in cardiomyocytes and endocardial endothelial cells in IHD, IHF, and NIHF. Blue stands for downregulation or inhibition of the molecule, orange/red for upregulation. Yellow line indicates inconsistent changes.

### Coronary artery EC - IHD

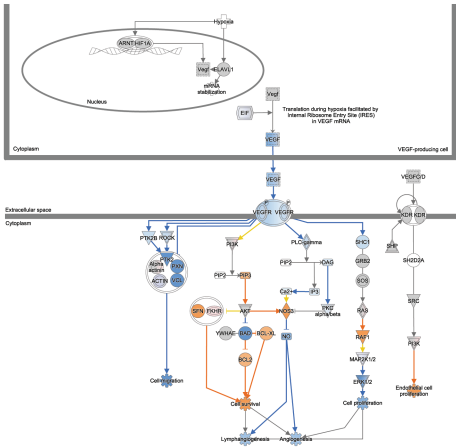

### Coronary artery EC - IHF

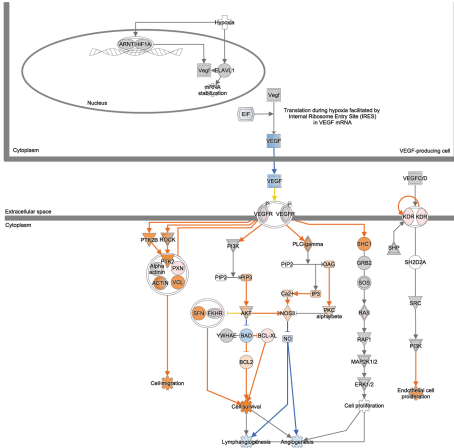

### Coronary artery EC - NIHF

No enrichment

### Arterial capillary EC - IHD

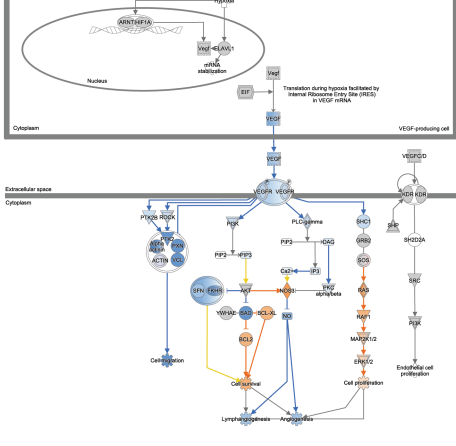

### Arterial capillary EC - IHF

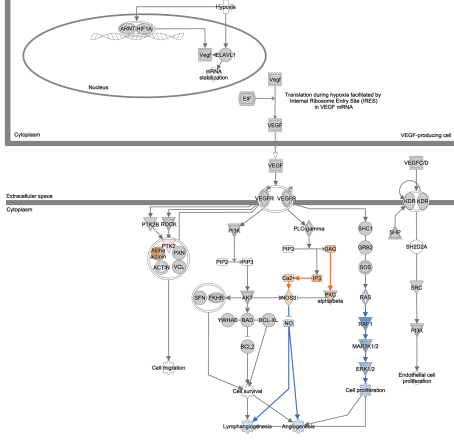

### Arterial capillary EC - NIHF

No enrichment

### Capillary EC - IHD

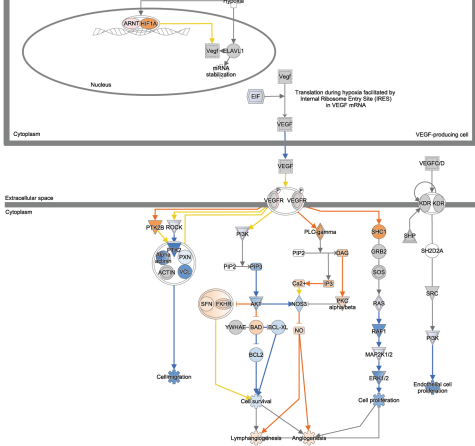

### Capillary EC - IHF

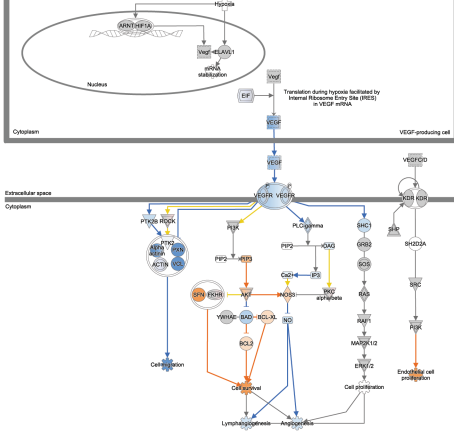

### Capillary EC - NIHF

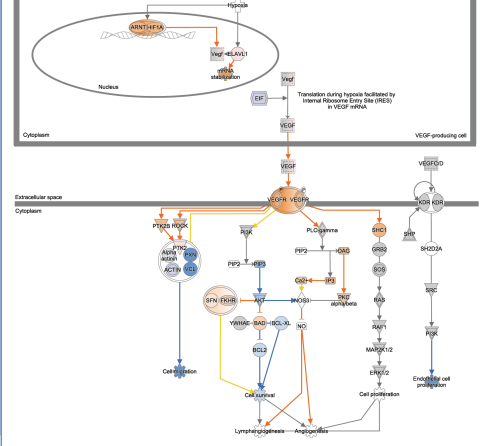

### Tip cells (EC) - IHD

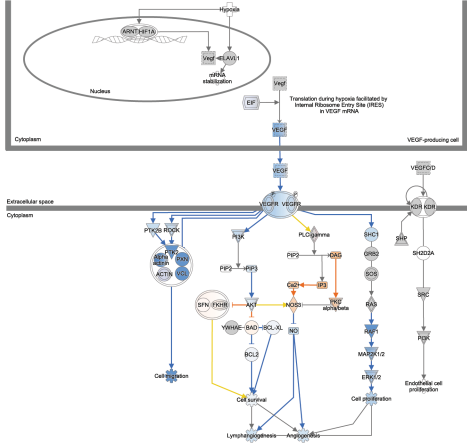

### Tip cells (EC) - IHF

No enrichment

### Tip cells (EC) - NIHF

No enrichment

**Fig. S3. VEGF signaling pathway from IPA in endothelial subtypes. Related to Figure 3.**

Blue stands for downregulation or inhibition, orange/red for upregulation. Yellow line indicates inconsistent changes.





**Fig. S4. HIF signaling pathway from IPA in endothelial subtypes in IHD, IHF, and NIHF. Related to Figure 3.**

Blue stands for downregulation or inhibition, orange/red for upregulation. Yellow line indicates inconsistent changes.

### Coronary artery EC - IHD

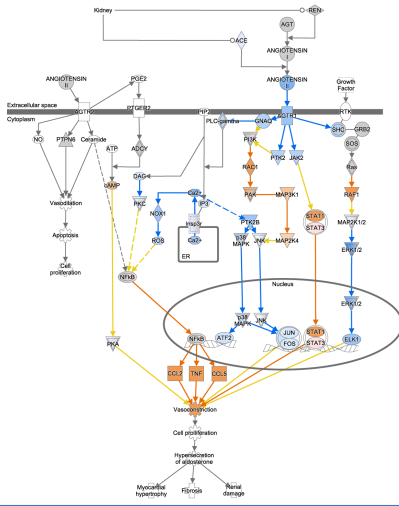

### Coronary artery EC - IHF

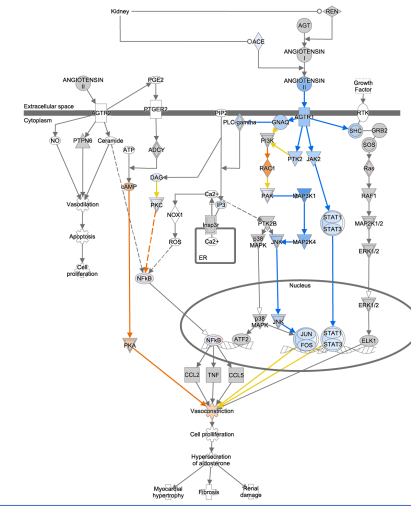

### Coronary artery EC - NIHF

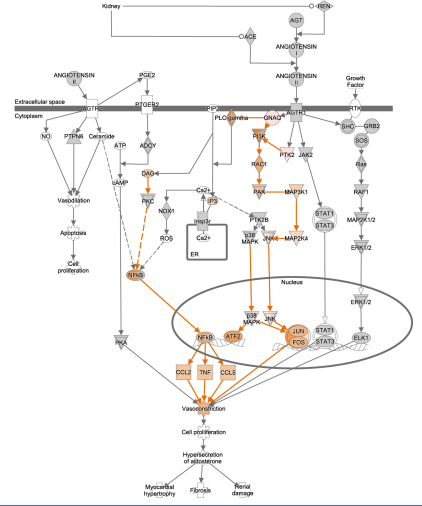

### Arterial capillary EC - IHD

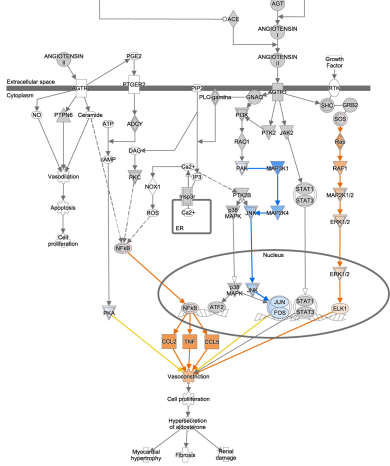

### Arterial capillary EC - IHF

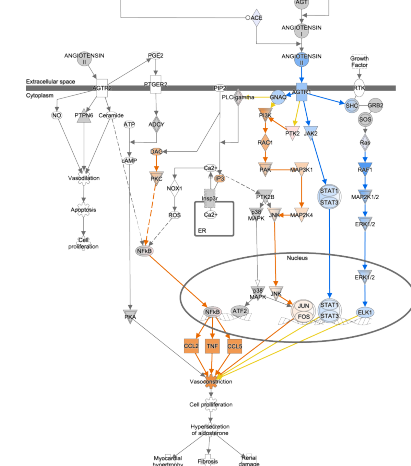

### Arterial capillary EC - NIHF

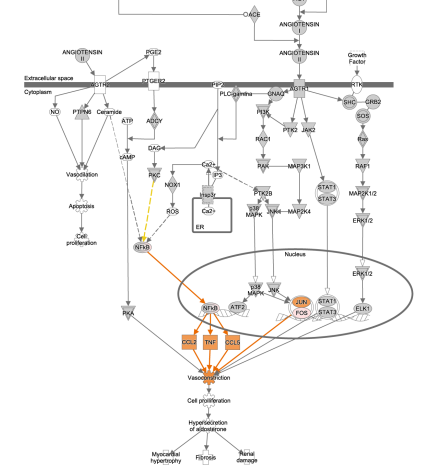

### Capillary EC - IHD

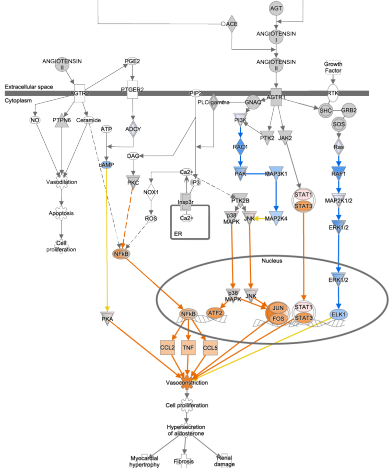

### Capillary EC - IHF

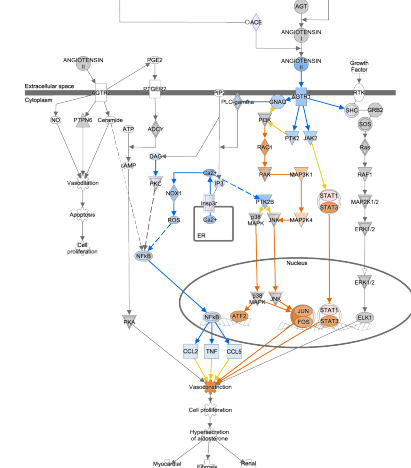

### Capillary EC - NIHF

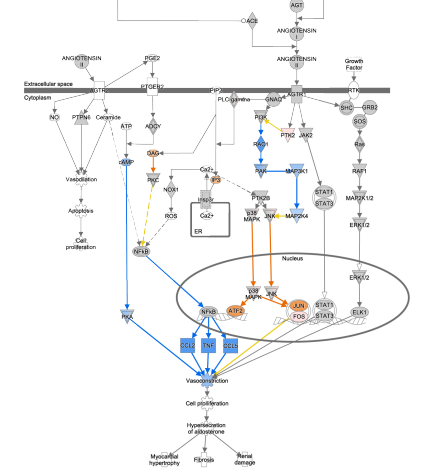

### Tip cells (EC) - IHD

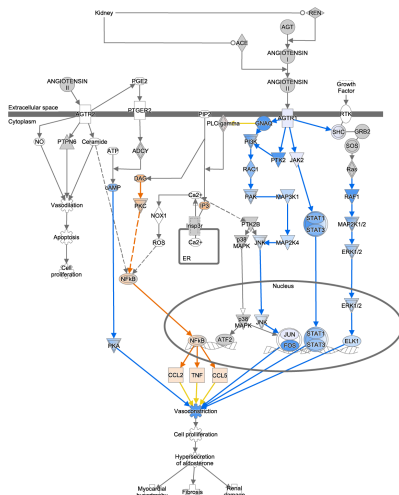

### Tip cells (EC) - IHF

No enrichment

### Tip cells (EC) - NIHF

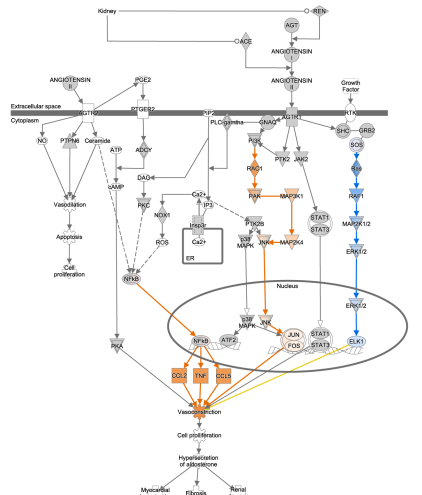

**Fig. S5. Renin signaling pathway from IPA in endothelial subtypes in IHD, IHF, and NIHF. Related to Figure 3.**

Blue stands for downregulation or inhibition, orange/red for upregulation. Yellow line indicates inconsistent changes.

**A**  
Disturbed flow vs Static control

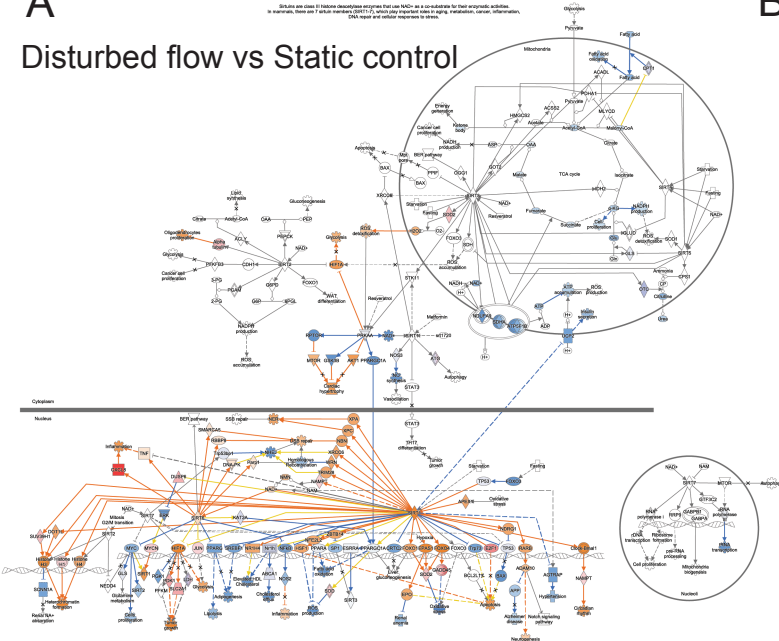

**B**

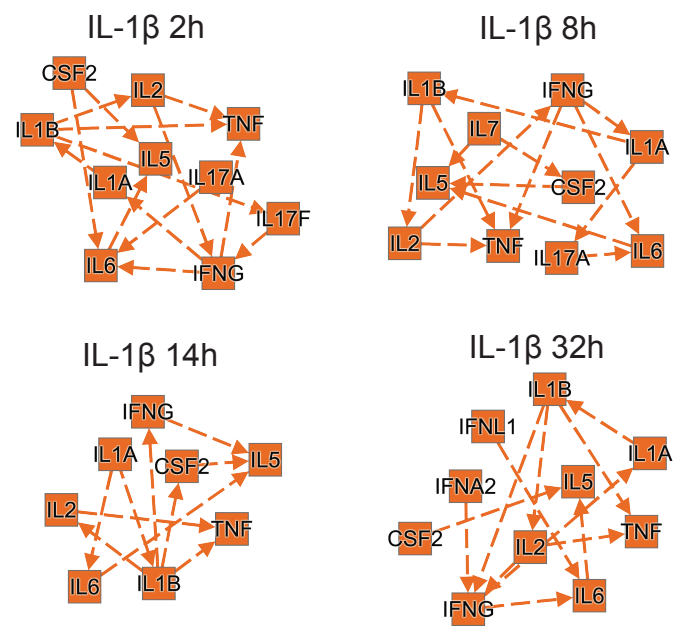

**C** IL-1 $\beta$  2h

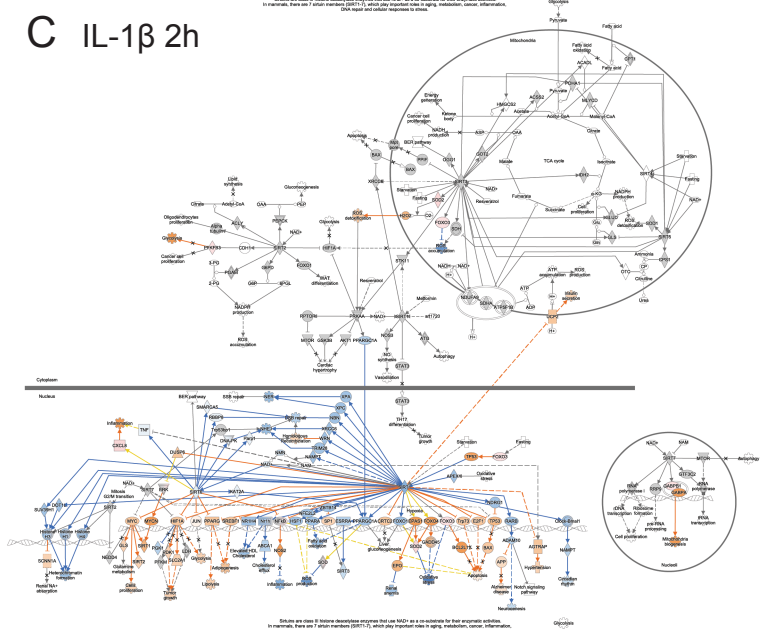

IL-1 $\beta$  8h

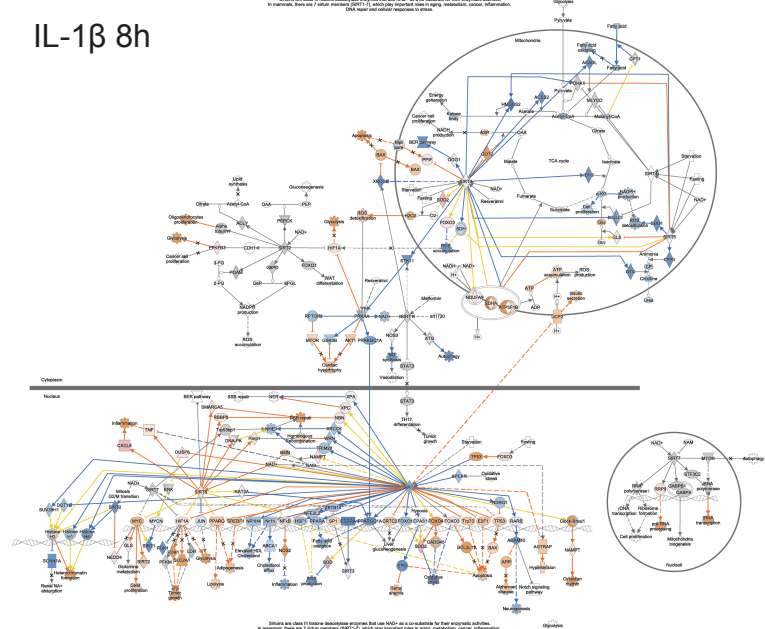

IL-1 $\beta$  14h

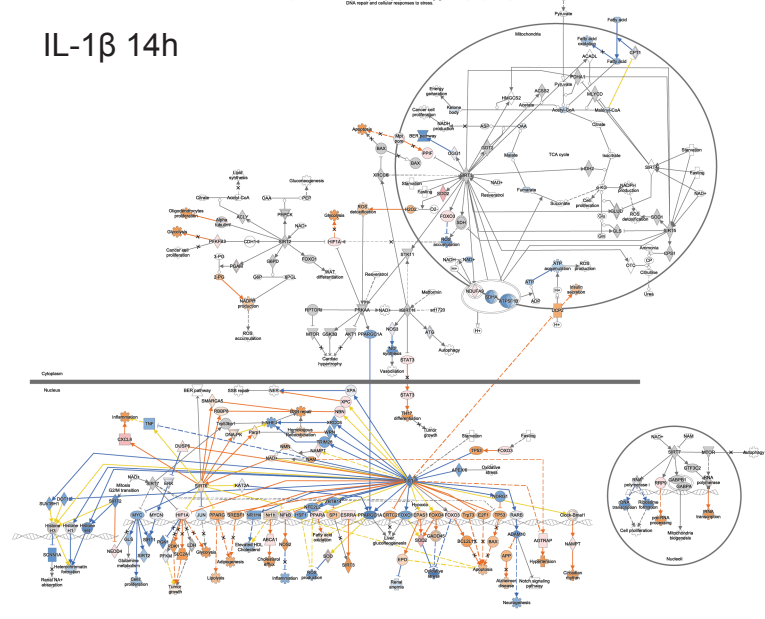

IL-1 $\beta$  32h

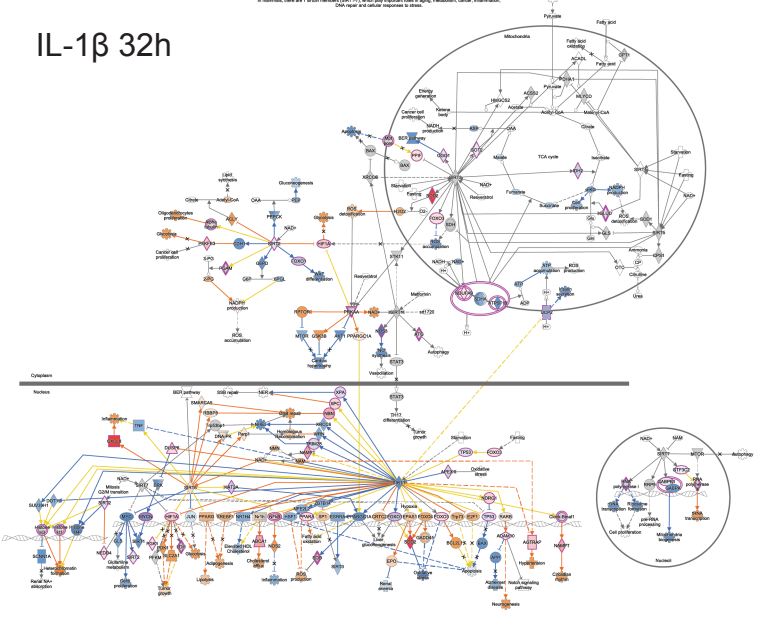

**Fig. S6. Endothelial cell response to disturbed flow and IL-1b stimulation. Related to Figure 3.**

**A.** Sirtuin signaling pathway from IPA in HUVEC cells under atheroprone (disturbed) flow versus static cells ( $N=3$ ). Blue stands for downregulation or inhibition, orange/red for upregulation. Yellow line indicates inconsistent changes. **B.** IL-1b network from IPA in stimulated HAEC cells. The cells were treated for 2, 8, 14, or 32h with IL-1b. The resulting RNA-seq data were analyzed with IPA (Qiagen) to construct the upstream regulator networks from the graphical summaries. **C.** Sirtuin signaling pathway from IPA in IL-1b-treated HAECs after 2, 8, 14, and 32h of treatment. Blue stands for downregulation or inhibition, orange/red for upregulation. Yellow line indicates inconsistent changes and purple highlights measured significant changes in the dataset. All signaling pathways were constructed with IPA (Qiagen) from either core or comparison analysis.

**A****Control****HF**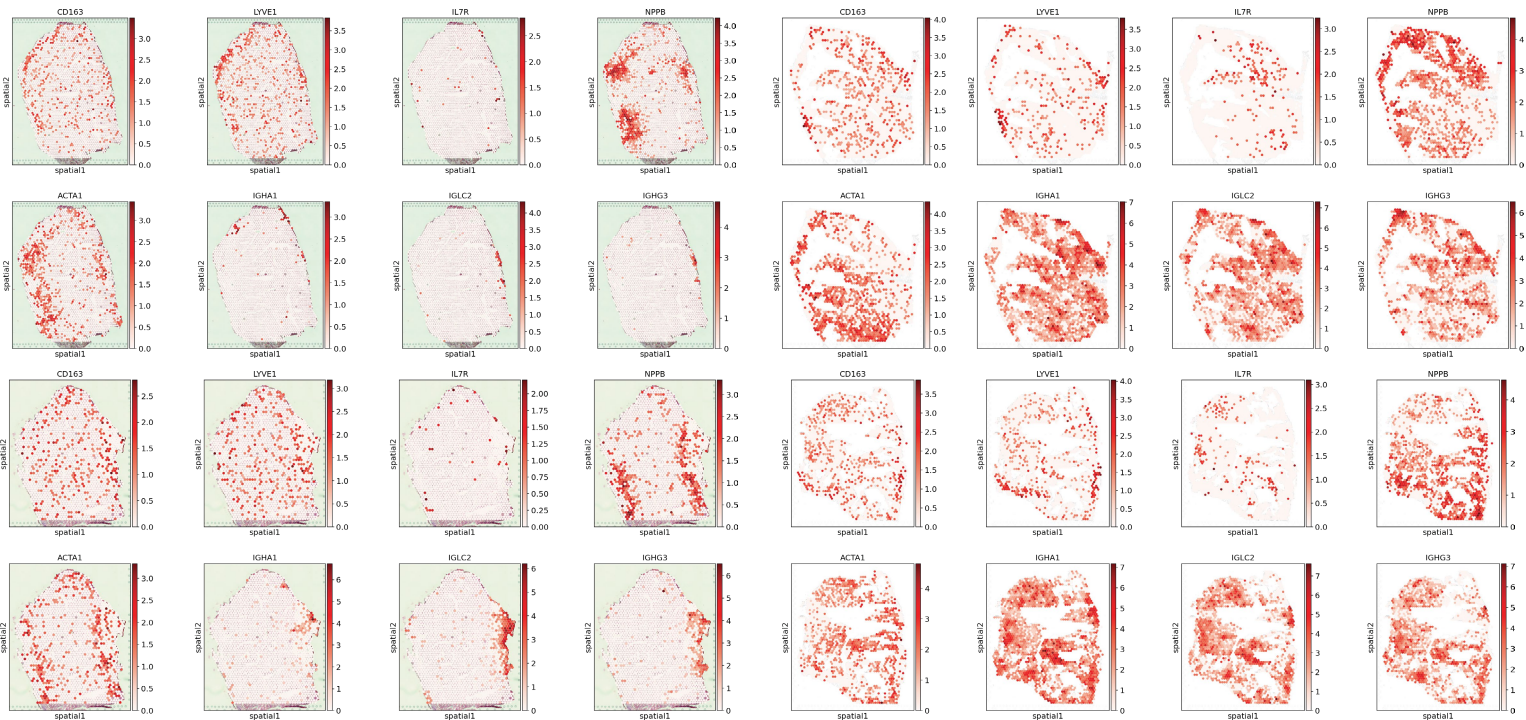**B****Heart tissue**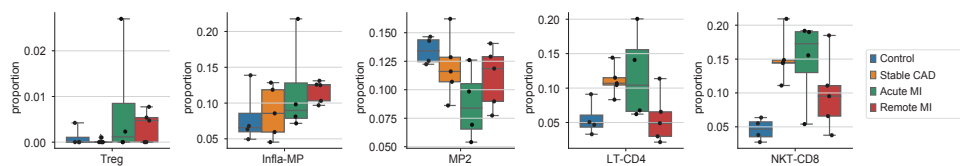**Pericardial fluid**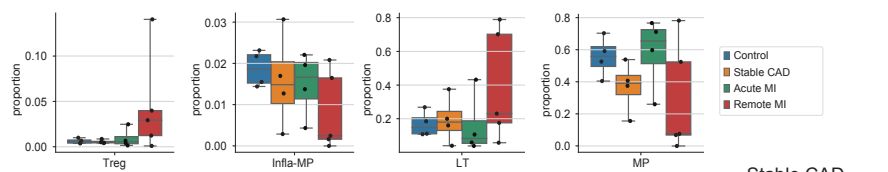**C****Acute MI****Stable CAD**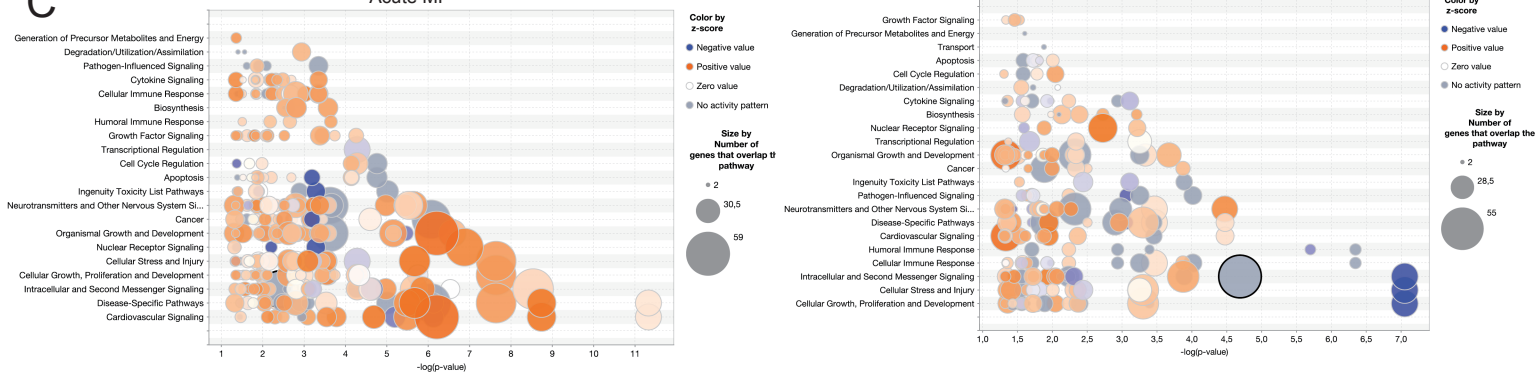**D**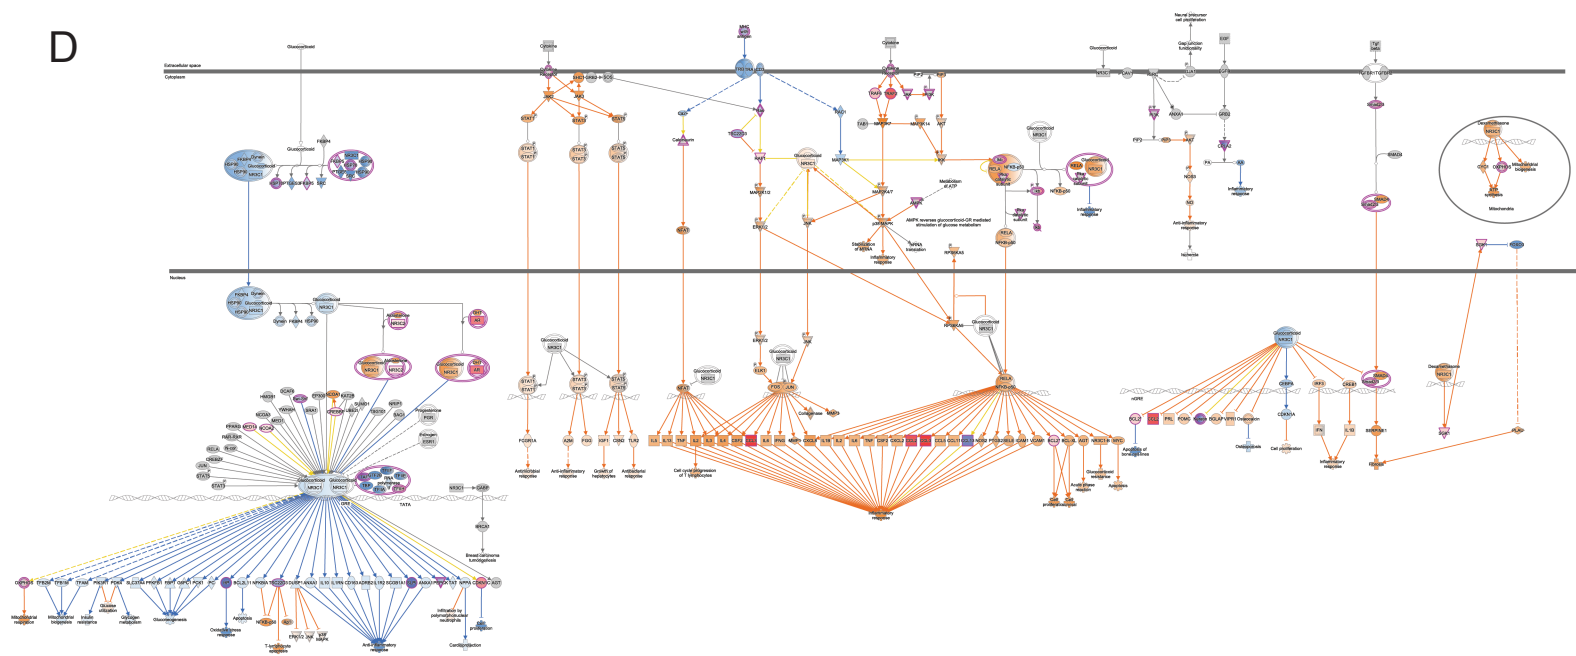

**Fig. S7. Immune cell proportion changes and transcriptional response. Related to Figures 4 and 5.**

**A.** Expression of *CD163*, *LYVE1*, *IL7R* on Visium slides, from a patient with heart failure and a control sample ( $n=4$ ). **B.** Proportion of selected immune cells across conditions in heart tissue and pericardial fluid. Whiskers show the maximum and minimum values, except for outliers (more than 1.5 times the interquartile).

**C.** Enrichment of general terms and pathway sharing between terms in macrophages (MP) in stable CAD and acute MI from IPA. A pathway shared between the terms is shown as a circle of the same size and color on the same vertical line between the terms. **D.** Glucocorticoid signaling pathway from IPA in MPs in stable CAD compared to control. Blue stands for downregulation or inhibition, orange/red for upregulation. Yellow line indicates inconsistent changes and purple highlights measured significant changes in the dataset.

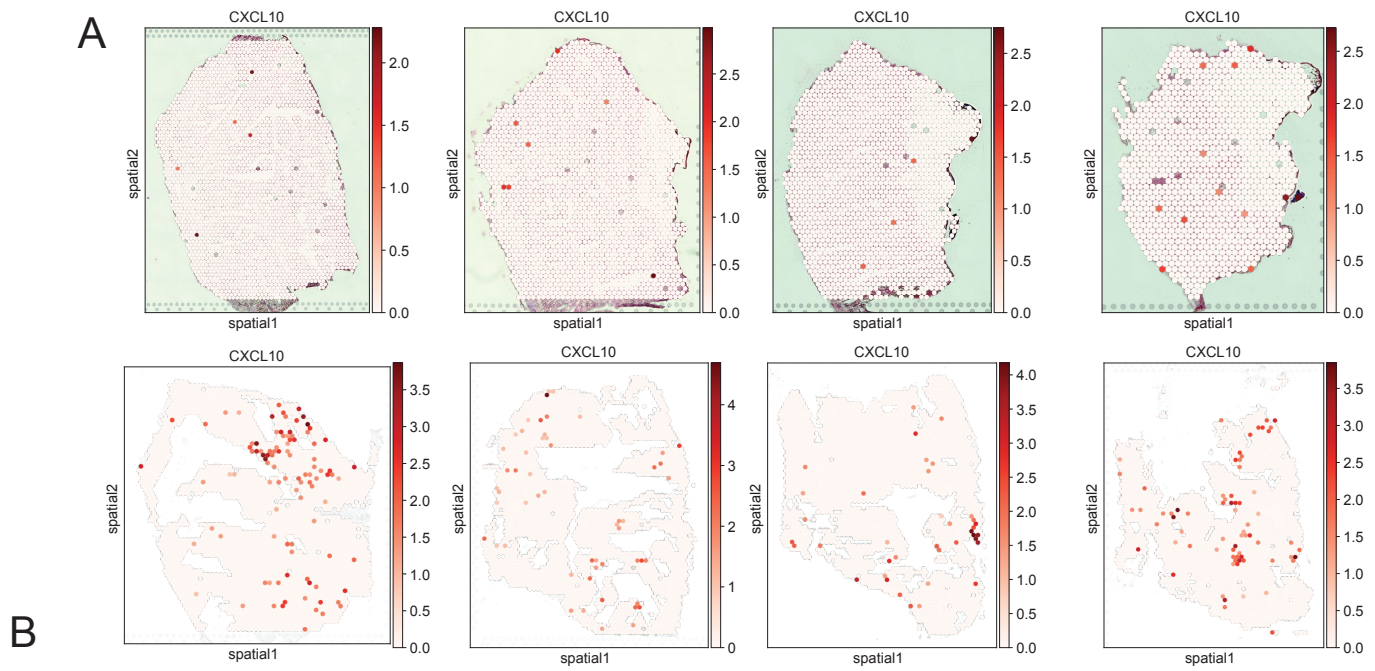

**B**

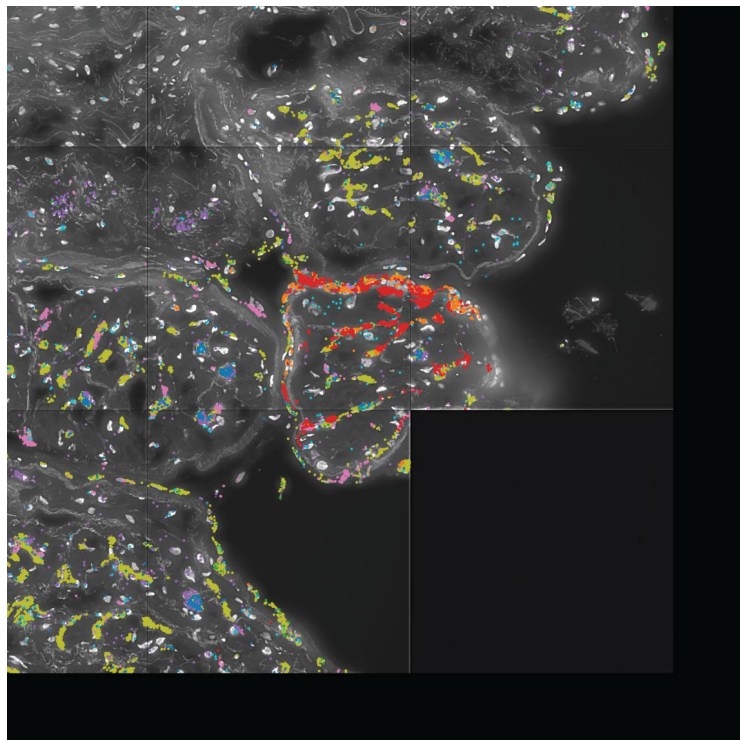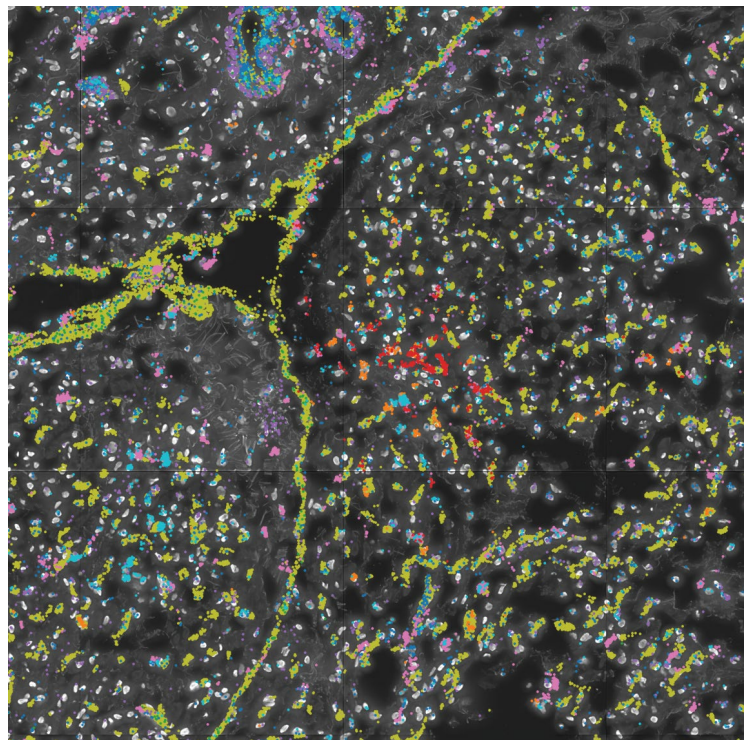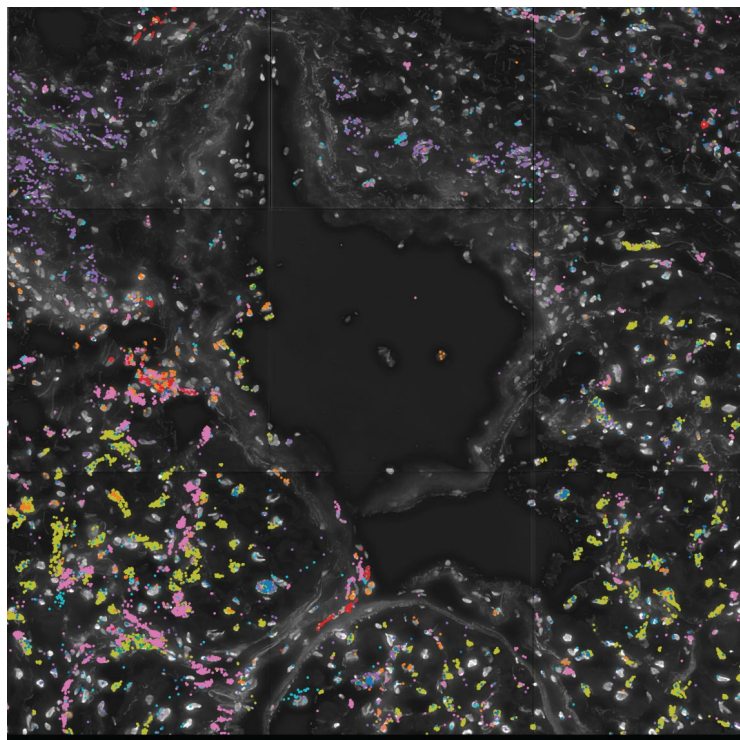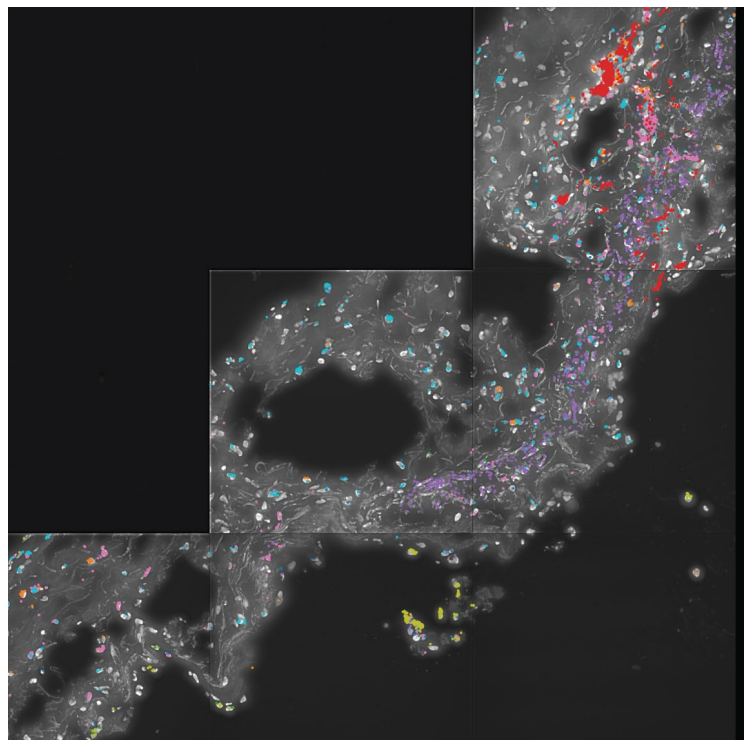

EC VEC EEC SMC L MP CLL8 + EGR2 CXCL10



**Fig. S8. Spatial distribution of CXCL10 expression. Related to Figure 6.**

**A.** Expression of *CXCL10* on Visium slides, from a patient with heart failure and a control sample ( $n=4$ ). **B.**

Spatial images (Resolve Molecular Cartography) for EC (*EMCN*, *ERG*, *PECAM1*, *CDH5*, *VWF*), VEC (*DKK2*, *ENPP2*, *PCSK5*, *CYYR1*), EEC (*PCDH7*), SMC (*NTRK3*, *MRVII*), L (*BCL11B*, *CD247*, *SKAPI*, *THEMIS*), MP (*CDI63*, *MRC1*, *F13A1*, *MS4A6A*), inflammatory (*CCL8* and *EGR2*), and *CXCL10* gene expression in IHD (upper panels and down left) and control (down right) samples.

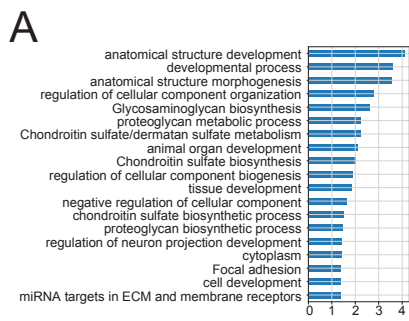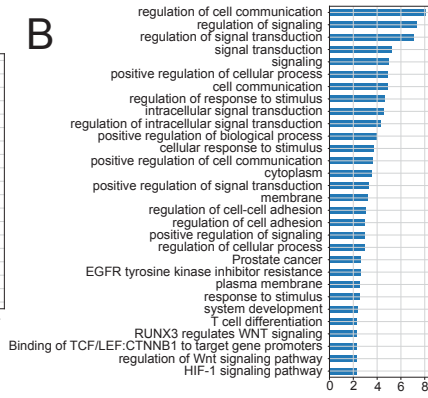

**C** Lymphocytes (T-cells)

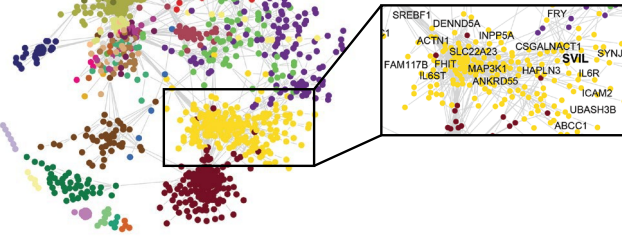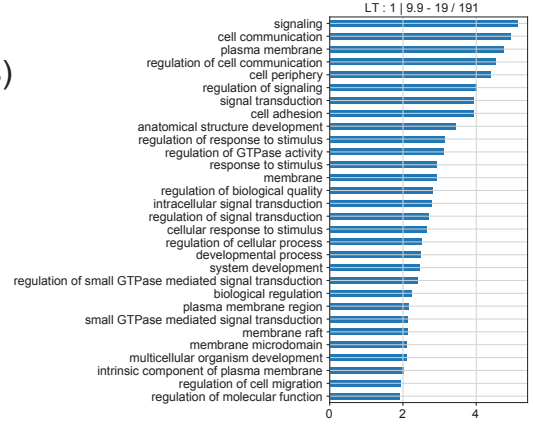

**D** NK-Cells

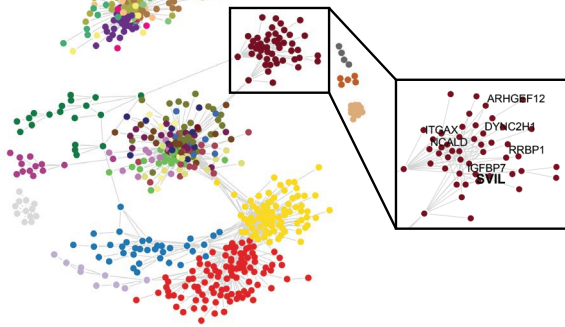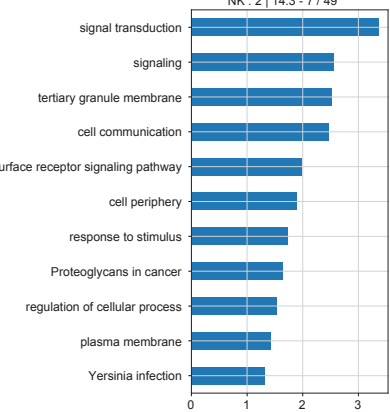

**E** Plasma and B cells

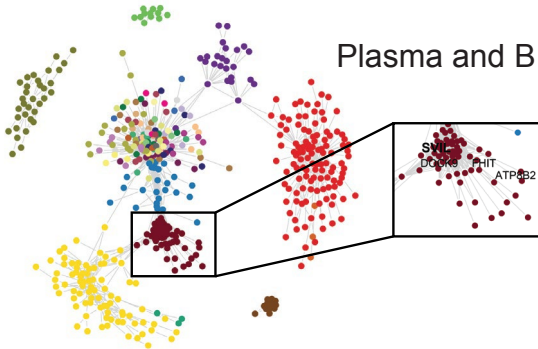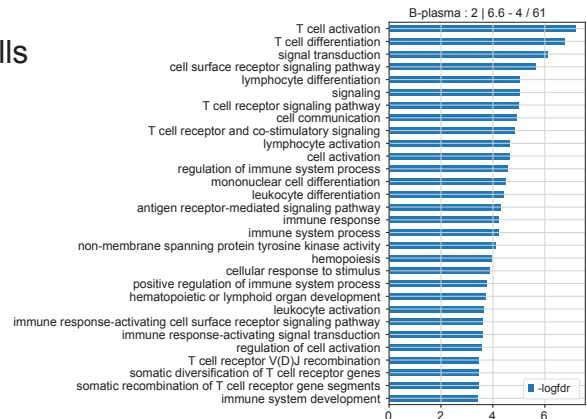

**F** Mesothelial cells

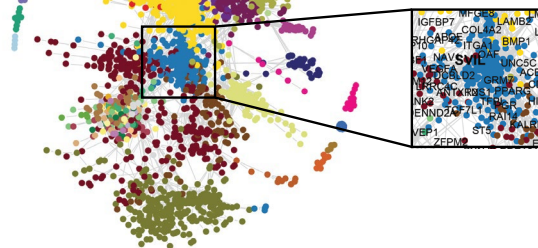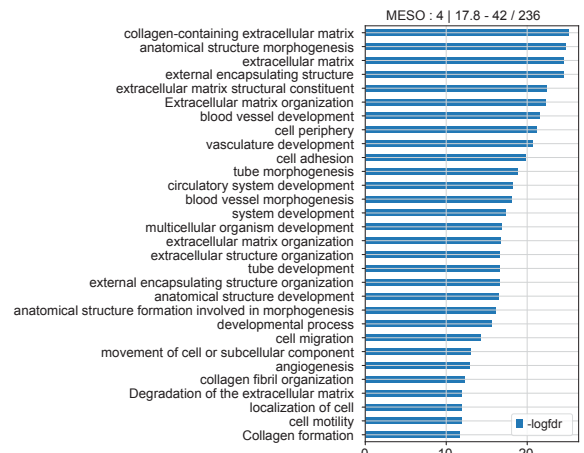

**Fig. S9. Co-expression modules of interest and associated gene-set enrichments. Related to Figure 7.**

**A.** Gene set enrichment with Enrichr for the gene-gene co-expression module containing *SVIL* in SMC. **B.** Gene

set enrichment with Enrichr of the gene-gene co-expression module containing *SVIL* in pericardial fluid cells.

**C-F.** Gene-gene co-expression modules within Pericardial fluid T lymphocytes, NK cells, B and plasma cells and Mesothelial cells, in addition to a zoom in view of *SVIL*-containing modules, with their associated gene set enrichments from Enrichr.

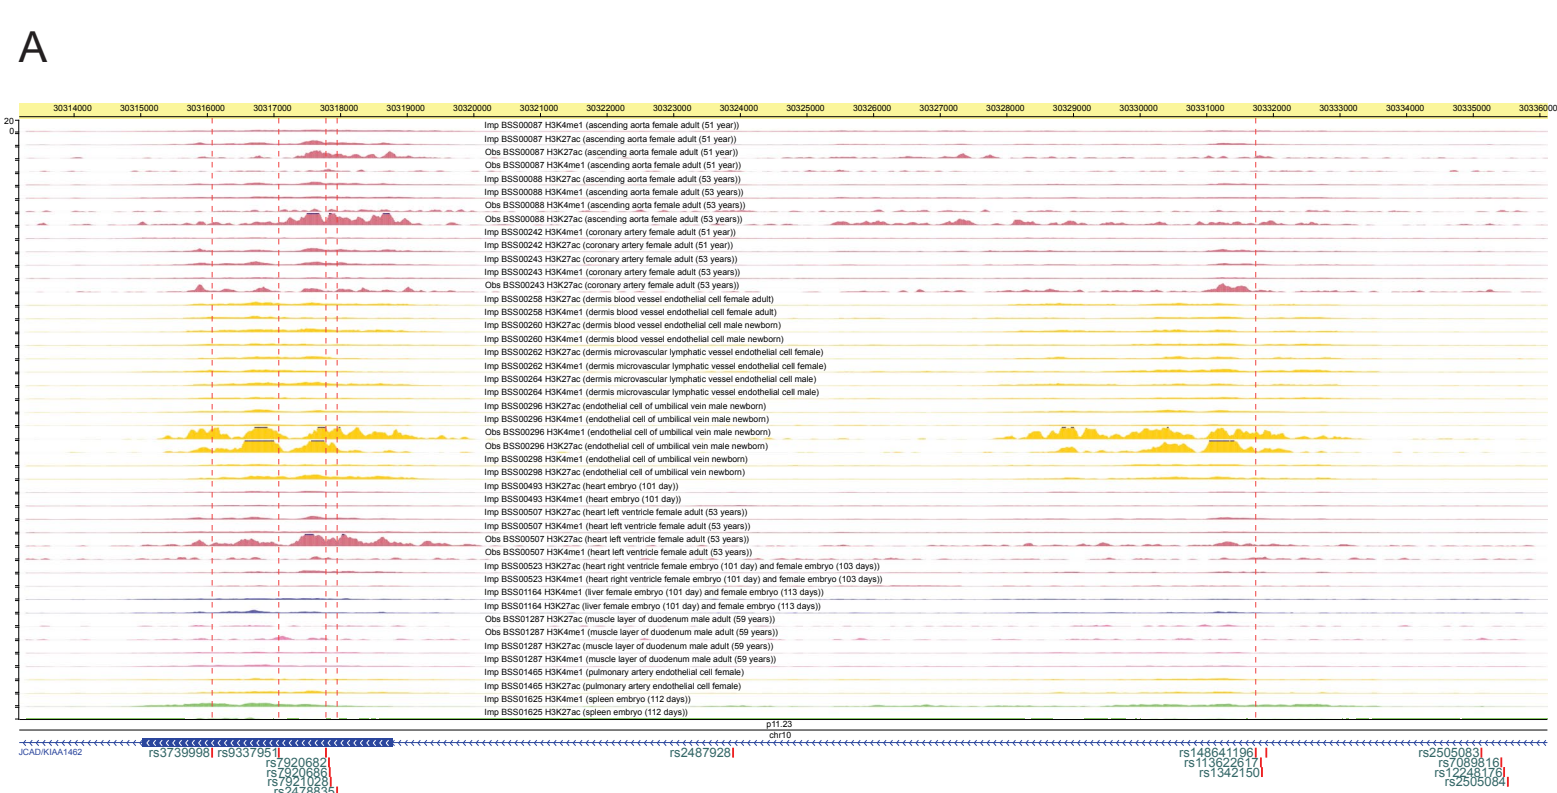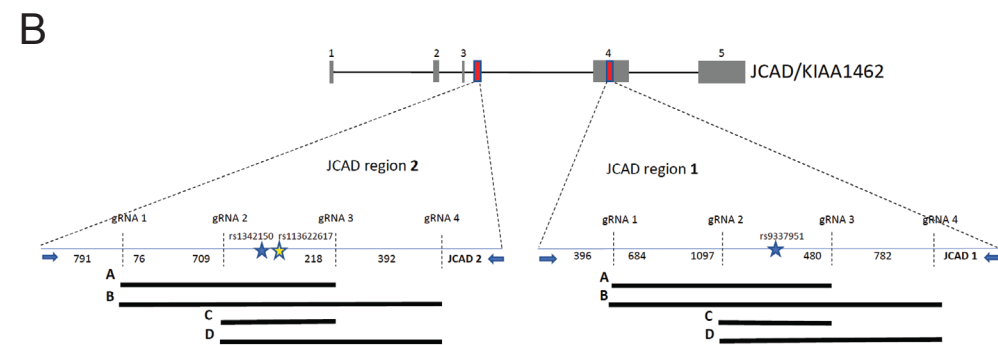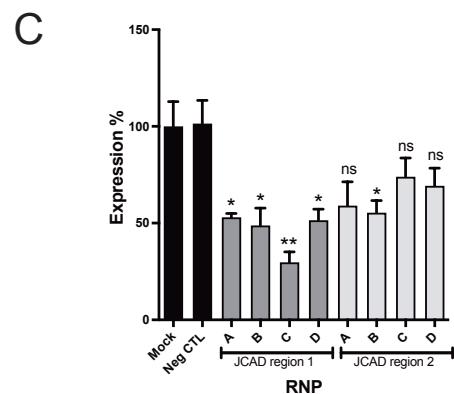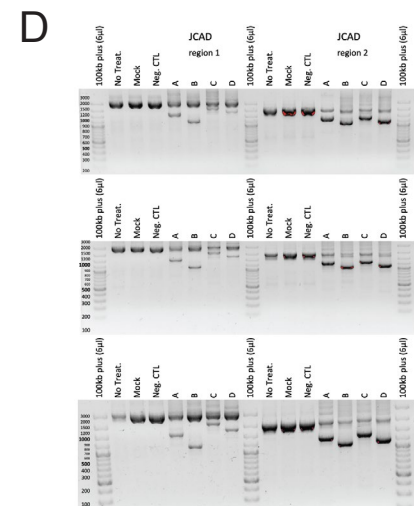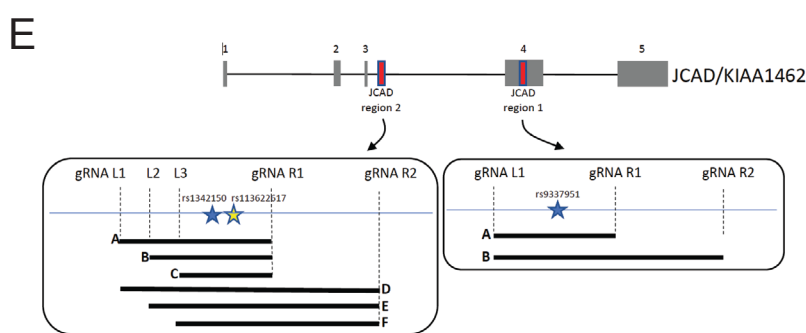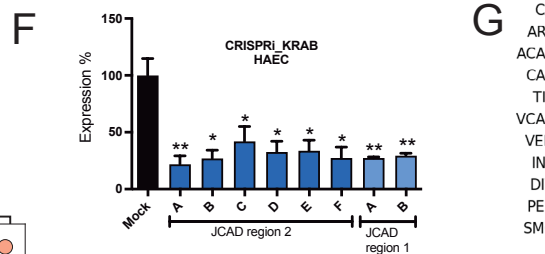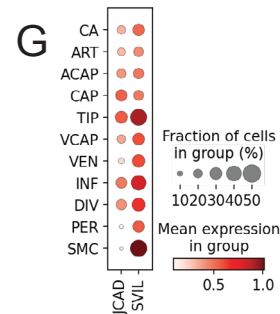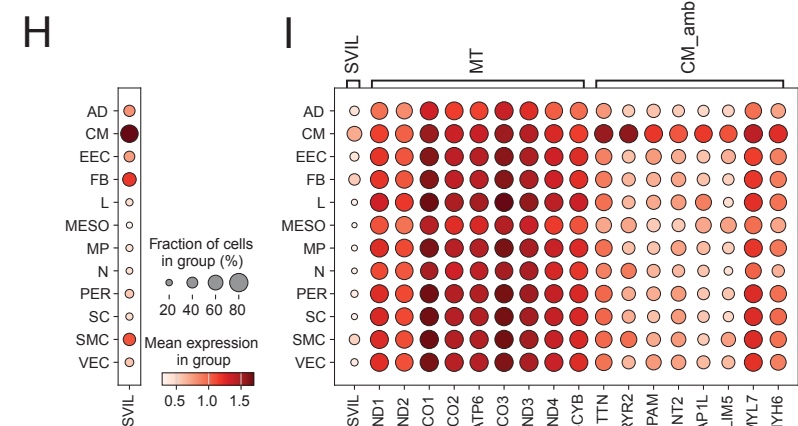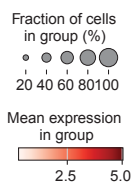

**Fig. S10. Dissection of *JCAD* / *SVIL* locus genetic variants, and *JCAD*/*SVIL* expression distribution in heart tissue. Related to Figure 7.**

**A.** Browser shot of the rs9337951 locus on chromosome 10 with histone marker signals for aorta, endothelial cells, heart, liver, muscle, and spleen. **B.** Schematic describing the regions targeted for CRISPR-mediated deletion using different combinations of two guide RNAs (gRNAs) within the *JCAD*/*SVIL* locus. **C.** The effect of CRISPR deletion on *JCAD* gene expression. **D.** Confirmation of the success and efficiency of deletion using PCR. **E.** Schematic describing the regions targeted for CRISPR-mediated inhibition using different combinations of two gRNAs **F.** The effect of CRISPR inhibition on *JCAD* gene expression. **G.** *JCAD* and *SVIL* expression in tissue cells by snRNA-seq. **H.** *SVIL* expression in main cell types in snRNA-seq data. **I.** *SVIL* expression together with mitochondrial (MT) and typical ambient RNA genes in the snRNA-seq data.

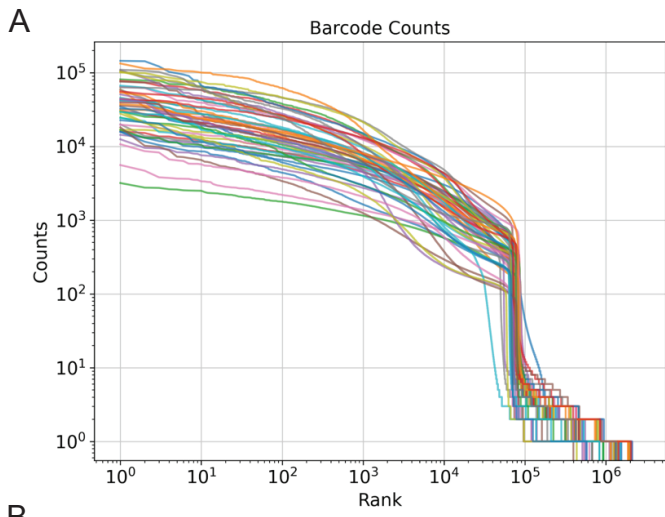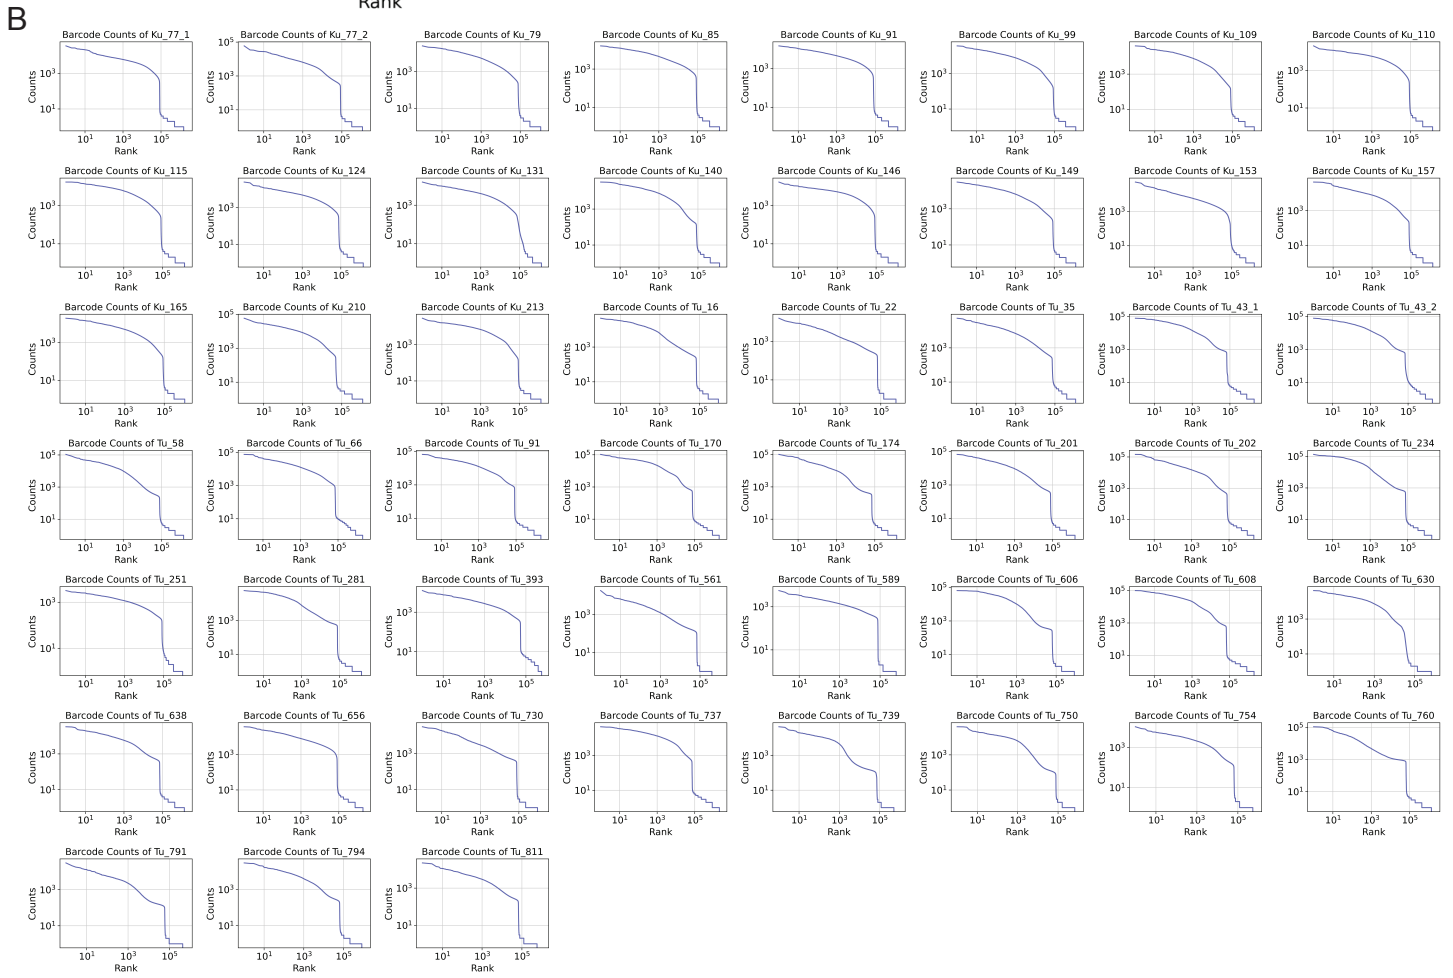

**Fig. S11. Heart snRNA-seq barcode rank plots. Related to STAR Methods.**

**A-B.** Heart snRNA-seq barcode rank Plots. **A:** Combined plot for all samples. **B:** Separate plot for each sample.

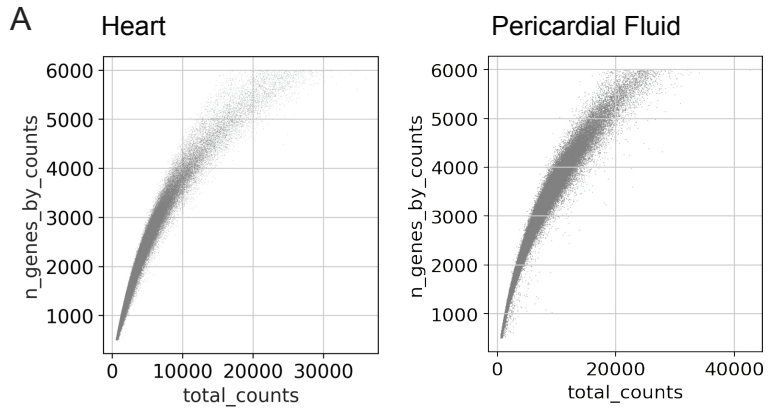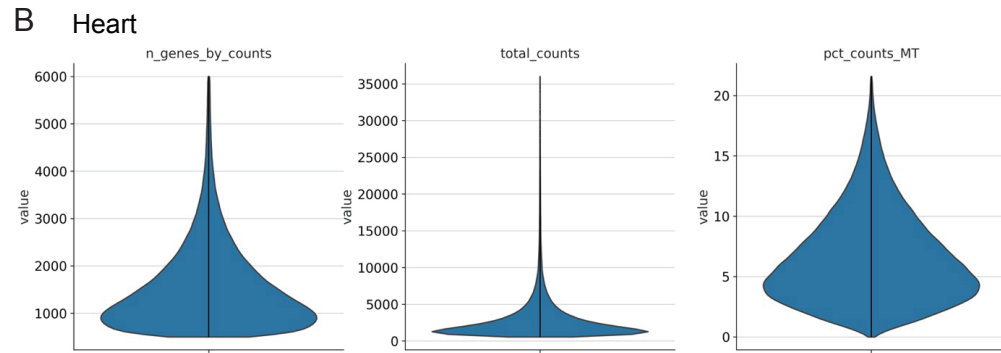



**Fig. S12. snRNA-seq QC metrics distribution. Related to STAR Methods.**

**A.** Scatter plot representing the number of detected genes and the total number of counts, for each nucleus, in the heart snRNA-seq samples (left), and pericardial fluid snRNA-seq samples (right). **B.** QC metric distribution across nuclei for heart snRNA-seq samples, after filtering. From left to right: number of detected genes, total number of counts, mitochondrial expression percentage.

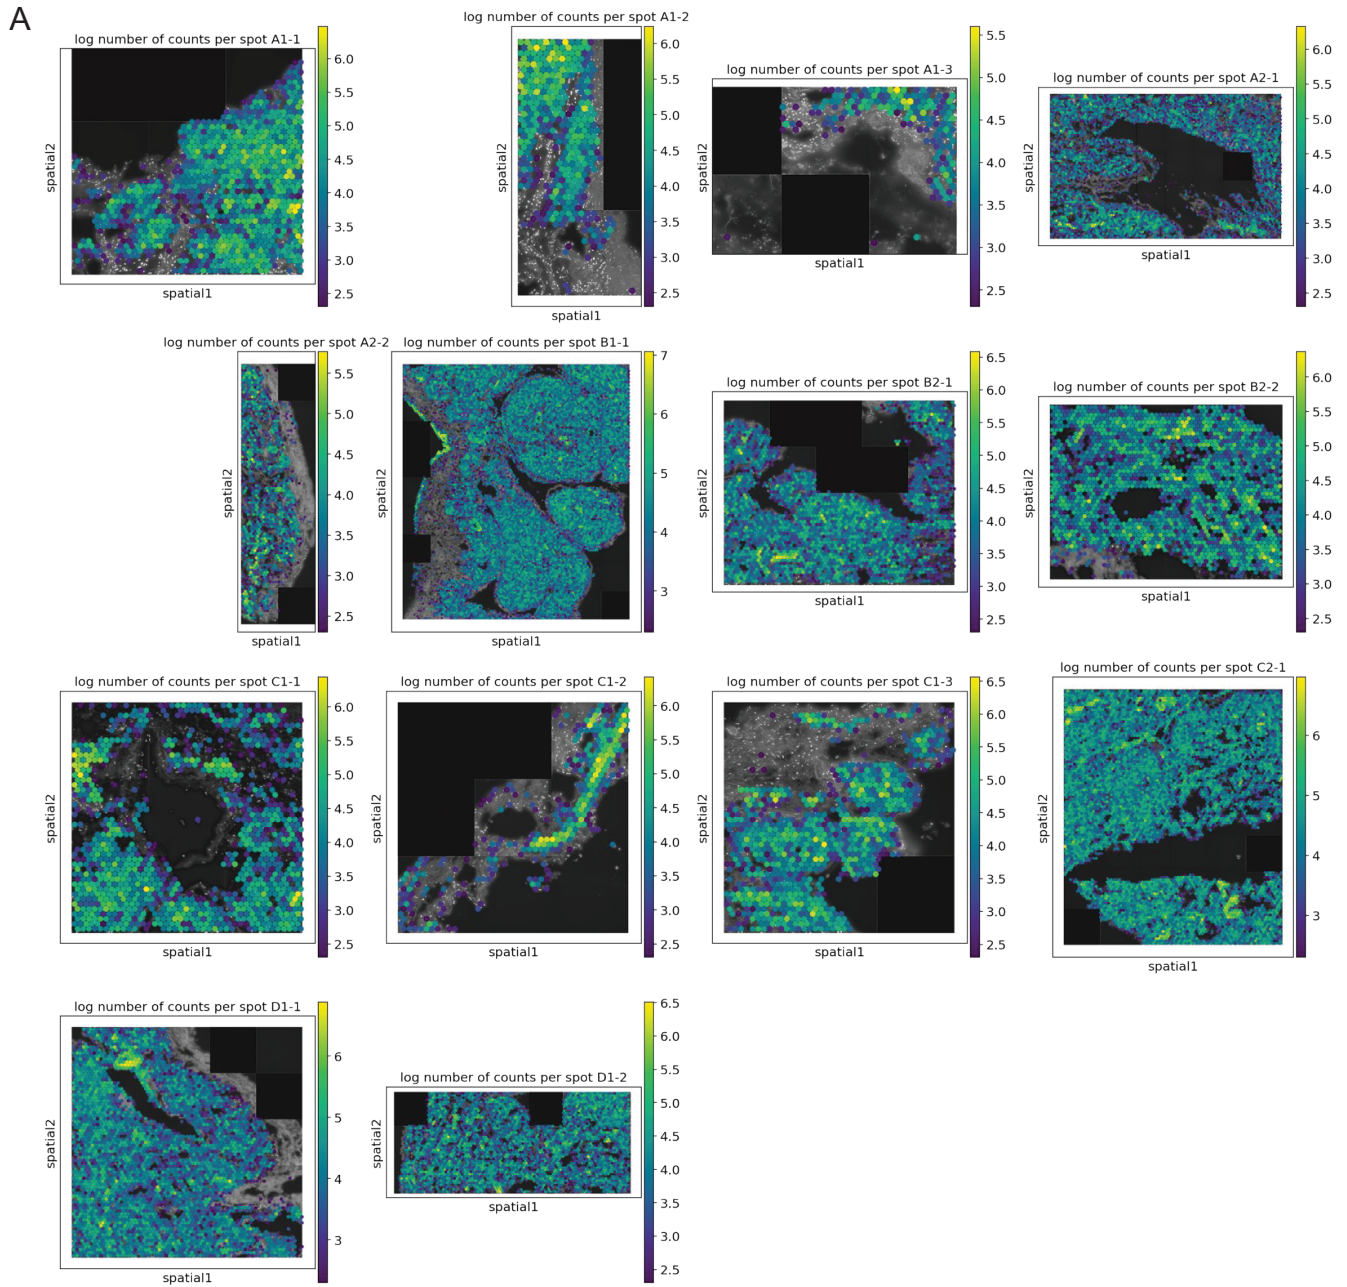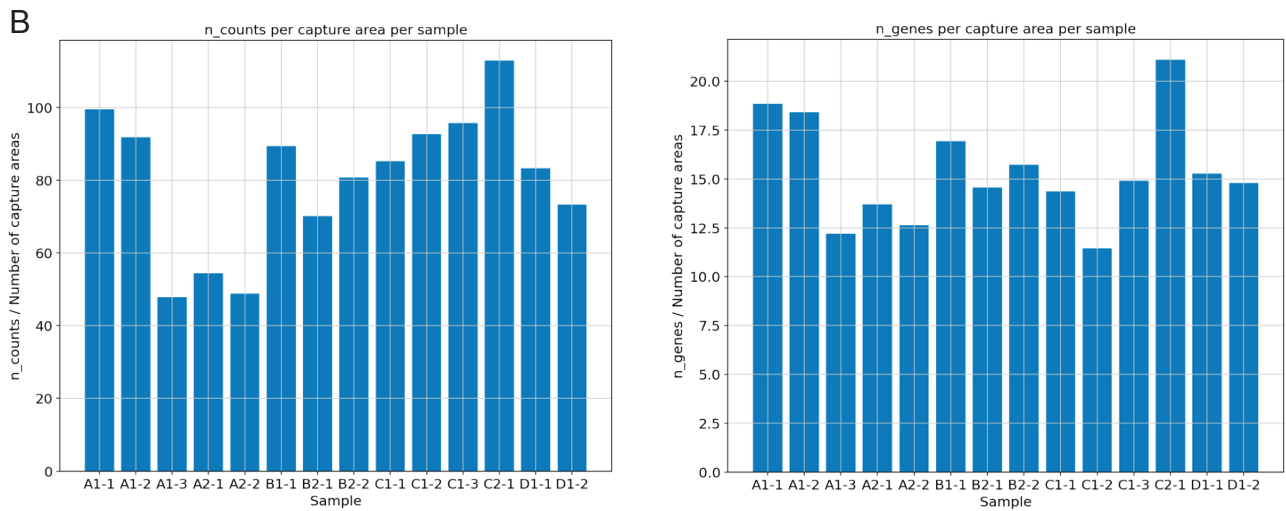

**Fig. S13. Resolve spatial transcriptomics QC metrics distribution. Related to STAR Methods.**

**A.** Distribution of number per transcript, for each Resolve spatial transcriptomics slide, in log scale. **B.** Average number of counts (left) and detected genes (right) per spot, for each Resolve spatial transcriptomics.

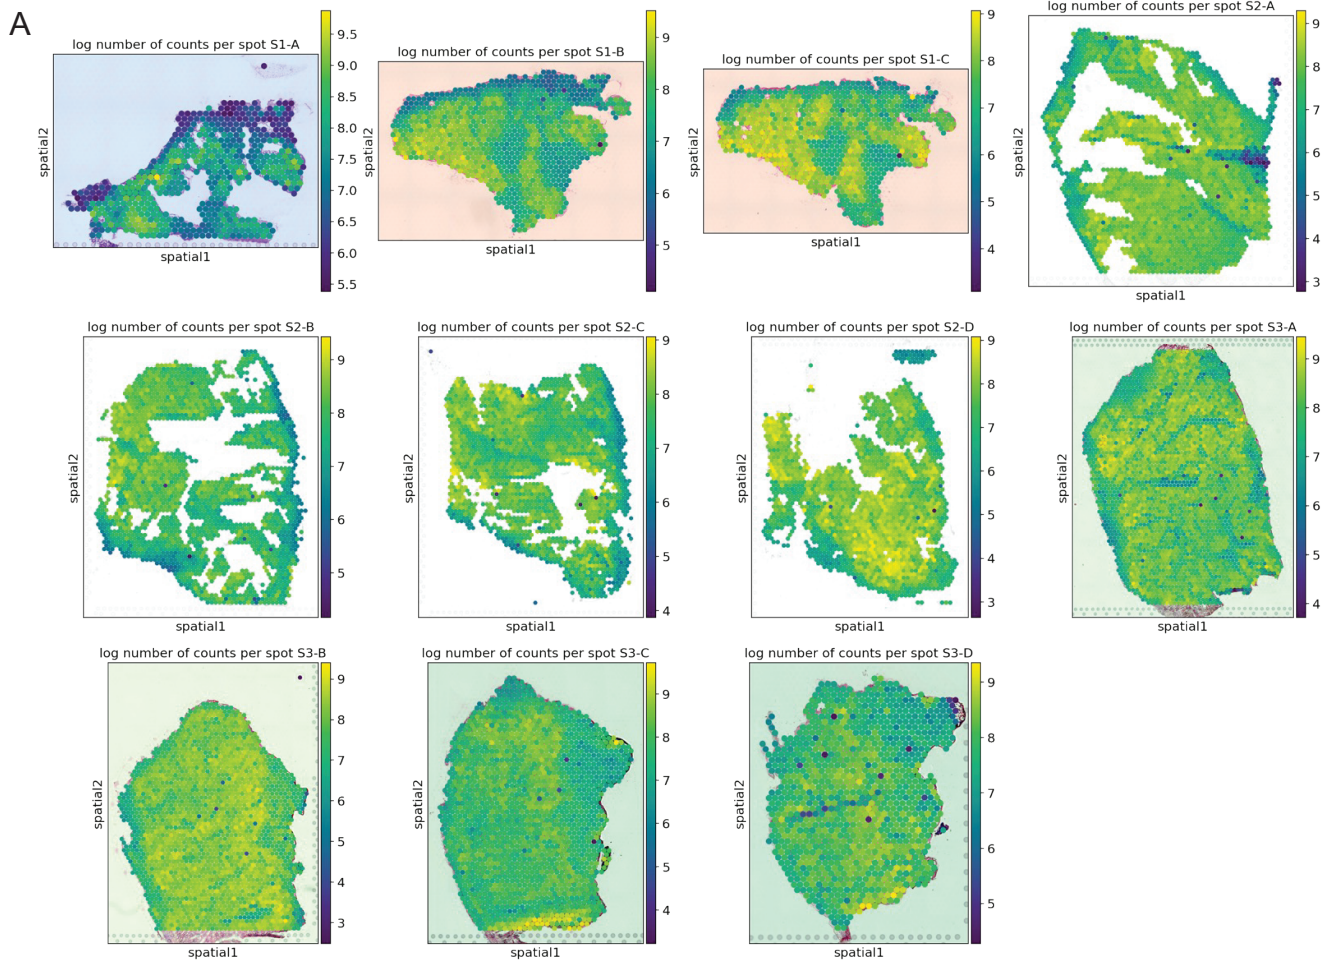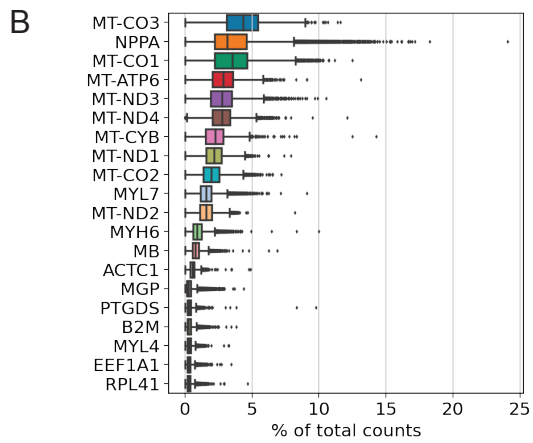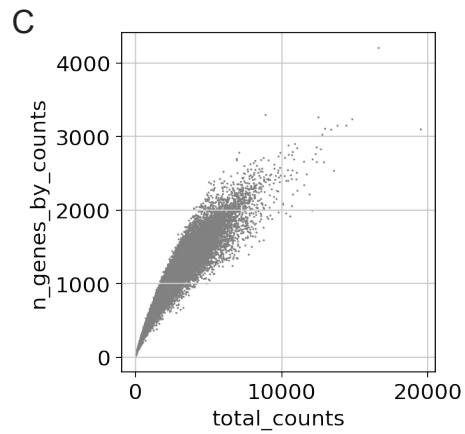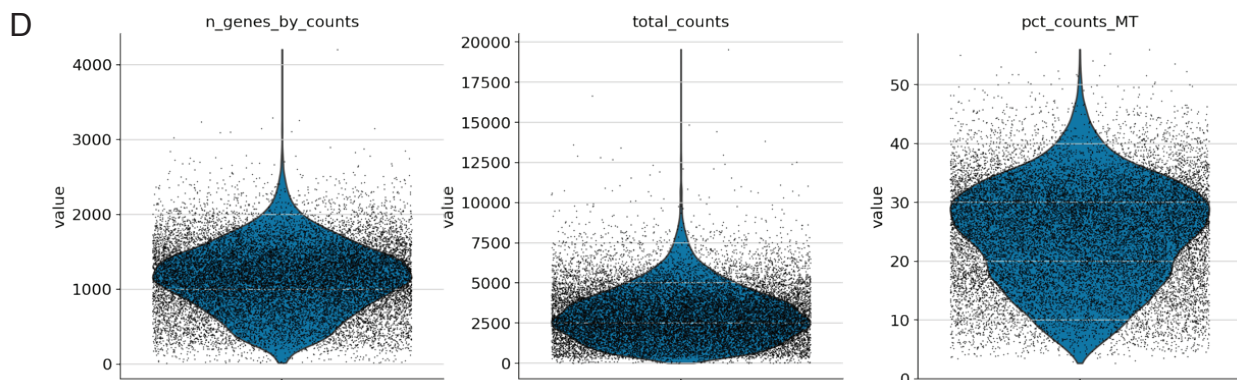

**Fig. S14. Visium spatial transcriptomics QC distribution. Related to STAR Methods.**

**A.** Distribution of number per transcript, for each Visium spatial transcriptomics slide, in log scale. **B.** Expression distribution (per capture area) of the top 20 highest expressed genes, in all Visium spatial transcriptomics samples. **C.** Scatter plot representing the number of detected genes and the total number of counts, for each spot, in all Visium spatial transcriptomics samples. **D.** QC metric distribution across all spots for all Visium spatial transcriptomics samples, after filtering. From left to right: number of detected genes, total number of counts, mitochondrial expression percentage.

**A**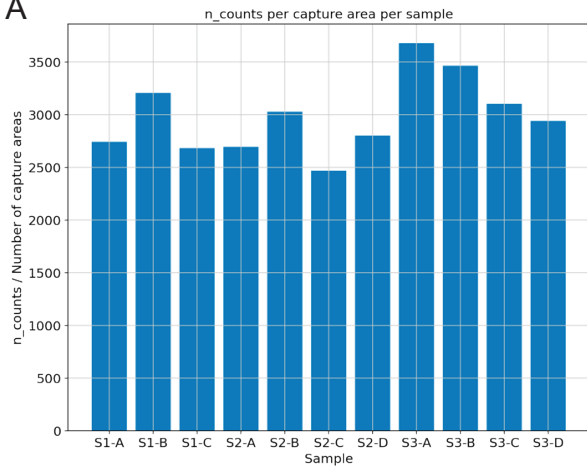**B**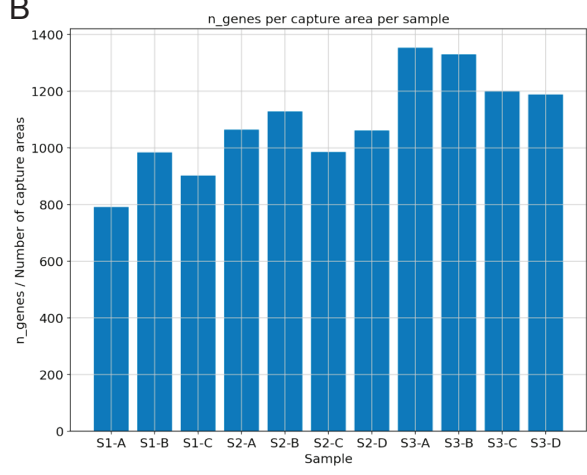

**Fig. S15. Distribution of the number of counts and genes for Visium spatial transcriptomics. Related to STAR Methods.**

**A-B.** Average number of counts (**A**) and detected genes (**B**) per spot, for each Visium spatial transcriptomics sample.

**Table S1. Results for allelic activity reporter assay. Related to Figure 7.**

| RS Number   | Position (GRCh37) | teloHAEC 0h |         | teloHAEC 6h II1b |          | teloHAEC 24h II1b |          | HASMCh chol |          | variant type |
|-------------|-------------------|-------------|---------|------------------|----------|-------------------|----------|-------------|----------|--------------|
|             |                   | logFC       | FDR     | logFC            | FDR      | logFC             | FDR      | logFC       | FDR      |              |
| rs2478839   | chr10:30306804    | 0,029497    | 0,89317 | -0,22841         | 0,594769 | 0,068412          | 0,895356 | 0,326823    | 0,203501 | common       |
| rs12762440  | chr10:30306879    | 0,503904    | 0,12795 | 0,584236         | 0,479108 | -0,21375          | 0,566648 | -0,50645    | 0,101235 | rare         |
| rs9337951   | chr10:30317073    | -0,70934    | 0,0661  | -0,22455         | 0,555735 | -0,08465          | 0,895356 | 0,471101    | 0,201433 | common       |
| rs531337994 | chr10:30317781    | 0,721114    | 0,0661  | 0,307885         | 0,488862 | 0,871545          | 0,16561  | 1,106221    | 0,004756 | rare         |
| rs7920682   | chr10:30317826    | -0,44092    | 0,17706 | 0,519276         | 0,479108 | -0,27119          | 0,56637  | -0,58955    | 0,115174 | common       |
| rs7920686   | chr10:30317838    | -0,44092    | 0,17706 | 0,519276         | 0,479108 | -0,27119          | 0,56637  | -0,58955    | 0,115174 | common       |
| rs7921028   | chr10:30317853    | -0,50678    | 0,33249 | 1,147921         | 0,479108 | -0,40207          | 0,56637  | -0,1748     | 0,75763  | rare         |
| rs2478835   | chr10:30317949    | 0,256671    | 0,36864 | -0,24893         | 0,549716 | 0,61482           | 0,264878 | 0,504799    | 0,101235 | common       |
| rs2487928   | chr10:30323892    | -0,16943    | 0,42384 | 0,312584         | 0,479108 | -0,02049          | 0,912102 | -0,26084    | 0,2621   | common       |
| rs148641196 | chr10:30331736    | -0,92915    | 0,00225 | -1,3914          | 0,001085 | 0,108742          | 0,895356 | -1,05572    | 0,004181 | rare         |
| rs113622617 | chr10:30331813    | 0,383709    | 0,12795 | 0,696887         | 0,042102 | 0,774711          | 0,49638  | 0,681045    | 0,091074 | rare         |
| rs1342150   | chr10:30331829    | -0,4658     | 0,0661  | -1,0913          | 0,003272 | -0,68255          | 0,49638  | -0,83159    | 0,004756 | common       |
| rs193042870 | chr10:30331895    | 0,353719    | 0,18304 | 0,954916         | 0,041686 | 1,121558          | 0,332584 | -0,4443     | 0,116393 | rare         |
| rs7089816   | chr10:30335422    | -0,16507    | 0,43332 | -0,25323         | 0,488862 | -0,15209          | 0,56637  | -0,24679    | 0,2621   | common       |
| rs12248176  | chr10:30335464    | 0,115829    | 0,58075 | -0,05112         | 0,914561 | -0,06663          | 0,895356 | 0,1731      | 0,423611 | rare         |
| rs2505084   | chr10:30335520    | 0,396745    | 0,17706 | 0,02093          | 0,931401 | 0,307866          | 0,332584 | 0,114771    | 0,566492 | common       |



**Table S2A. CAREBANK samples characteristics. Related to STAR Methods.**

|                                             | <b>Control</b> | <b>IHD</b> | <b>IHF</b> | <b>NIHF</b> |
|---------------------------------------------|----------------|------------|------------|-------------|
| N                                           | 6              | 11         | 11         | 3           |
| Gender                                      | 4M 2F          | 9M 2F      | 10M 1F     | 2M 1F       |
| Age (years) *                               | 67± 4          | 68 ± 8     | 66 ± 13    | 72 ± 6      |
| BMI (kg/m2) *                               | 29 ± 4         | 30 ± 4     | 28 ± 5     | 29 ± 4      |
| Smoker                                      | 0              | 0          | 4          | 0           |
| Atrial fibrillation                         | 0              | 0          | 2          | 2           |
| Treatment for hypertension                  | 4              | 9          | 9          | 3           |
| Treatment for diabetes                      | 2              | 4          | 6          | 0           |
| Treatment for Hypercholesterolemia          | 3              | 10         | 11         | 1           |
| Heart failure                               | 0              | 0          | 5          | 3           |
| Prior Stroke / TIA                          | 1              | 0          | 1          | 0           |
| Previous myocardial infarction              | 0              | 0          | 4          | 0           |
| Previous PCI                                | 0              | 3          | 2          | 0           |
| Previous CABG                               | 0              | 0          | 0          | 0           |
| Number of stenosis in the coronary arteries | 0              | 2          | 2          | 0           |
| LVEF*                                       | 64 ± 4         | 64 ± 7     | 38 ± 7     | 41 ± 9      |
| Betablocker                                 | 2              | 10         | 9          | 3           |
| Calcium blocker                             | 0              | 3          | 4          | 2           |
| ACE-inhibitor                               | 5              | 7          | 10         | 3           |
| Warfarin                                    | 0              | 0          | 3          | 0           |
| NOAC                                        | 0              | 1          | 1          | 1           |
| ASA                                         | 4              | 9          | 7          | 0           |
| ADPB                                        | 0              | 1          | 1          | 0           |
| Statin                                      | 3              | 10         | 11         | 1           |
| Insuline                                    | 0              | 3          | 4          | 0           |

\*Mean ± Standard deviation

**Table S2B. PERIHEART samples characteristics. Related to STAR Methods.**

|                                             | Control  | stable CAD | acute MI | remote MI |
|---------------------------------------------|----------|------------|----------|-----------|
| N                                           | 4        | 5          | 4        | 5         |
| Gender                                      | all male | all male   | all male | all male  |
| Age (years) *                               | 61±7     | 68 ±4      | 66 ±6    | 72 ±6     |
| BMI (kg/m2) *                               | 26 ±4    | 26 ±3      | 25 ±2    | 28 ±3     |
| Smoker                                      | 0        | 0          | 2        | 2         |
| Atrial fibrillation                         | 0        | 0          | 0        | 0         |
| Treatment for hypertension                  | 3        | 4          | 3        | 3         |
| Treatment for diabetes                      | 0        | 1          | 1        | 2         |
| Treatment for Hypercholesterolemia          | 1        | 3          | 4        | 3         |
| Heart failure                               | 0        | 0          | 2        | 1         |
| Prior Stroke / TIA                          | 0        | 0          | 0        | 0         |
| Previous myocardial infarction              | 0        | 0          | 4        | 5         |
| Previous PCI                                | 0        | 0          | 1        | 3         |
| Previous CABG                               | 0        | 0          | 0        | 0         |
| Number of stenosis in the coronary arteries | 0        | 3          | 3        | 3         |
| LVEF *                                      | 75 ±4    | 61 ±7      | 49 ±13   | 48 ±9     |
| Betablocker                                 | 2        | 2          | 3        | 5         |
| Calcium blocker                             | 0        | 0          | 2        | 0         |
| ACE-inhibitor                               | 1        | 1          | 2        | 4         |
| Warfarin                                    | 0        | 0          | 0        | 2         |
| NOAC                                        | 0        | 0          | 0        | 0         |
| ASA                                         | 0        | 4          | 3        | 4         |
| ADPB                                        | 0        | 0          | 1        | 1         |
| Statin                                      | 1        | 4          | 3        | 5         |
| Insuline                                    | 0        | 0          | 0        | 0         |

\*Mean ± Standard deviation
